1 **Title:** The wiring logic of an identified serotonergic neuron that spans sensory networks

2  
3 **Authors:** Kaylynn E. Coates<sup>1</sup>, Steven A. Calle-Schuler<sup>2</sup>, Levi M. Helmick<sup>1</sup>, Victoria L.  
4 Knotts<sup>1</sup>, Brennah N. Martik<sup>1</sup>, Farzaan Salman<sup>1</sup>, Lauren T. Warner<sup>1</sup>, Sophia V. Valla<sup>1</sup>,  
5 Davi D. Bock<sup>2,3</sup>, Andrew M. Dacks<sup>1, 4</sup>

6  
7 **Author Affiliations:**

8 <sup>1</sup>Department of Biology, West Virginia University, Morgantown, WV 26506, USA

9 <sup>2</sup>Janelia Research Campus, Howard Hughes Medical Institute, Ashburn, VA 20147,  
10 USA

11 <sup>3</sup>Department of Neurological Sciences, Larner College of Medicine, University of  
12 Vermont, 89 Beaumont Avenue, Burlington, VT 05405, USA

13 <sup>4</sup>Department of Neuroscience, West Virginia University, Morgantown, WV 26506, USA

14  
15 **\*Correspondence:** kaylynn.coates@gmail.com, amdacks@mail.wvu.edu

16  
17 **Competing Interests:** The authors declare that no competing interests exist.

18  
19 **Abstract**

20 Serotonergic neurons modulate diverse physiological and behavioral processes in a  
21 context-dependent manner, based on their complex connectivity. However, their  
22 connectivity has not been comprehensively explored at a single-cell resolution. Using a  
23 whole-brain EM dataset we determined the wiring logic of a broadly projecting  
24 serotonergic neuron (the “CSDn”) in *Drosophila*. Within the antennal lobe (AL; first-order  
25 olfactory region), the CSDn receives glomerulus-specific input and preferentially targets  
26 distinct local interneuron subtypes. Furthermore, the wiring logic of the CSDn differs  
27 between olfactory regions. The CSDn innervates the AL and lateral horn (LH), yet does  
28 not maintain the same synaptic relationship with individual projection neurons that also  
29 span both regions. Consistent with this, the CSDn has more distributed connectivity in  
30 the LH relative to the AL, preferentially synapsing with principal neuron types based on  
31 presumptive transmitter content. Lastly, we identify protocerebral neurons that provide  
32 abundant synaptic input to the CSDn. Our study demonstrates how an individual  
33 modulatory neuron can interact with local networks and integrate input from non-  
34 olfactory sources.

35  
36 **Introduction**

37 Every neural network receives modulatory input from a variety of sources [1, 2],  
38 and in some cases from heterogeneous populations of neurons that release the same  
39 modulatory transmitter [3-5]. In mammals, one ubiquitous neuromodulator, serotonin, is  
40 released by tens of thousands to hundreds of thousands of neurons which originate in  
41 the raphe nuclei and project throughout the brain [6, 7]. Serotonergic raphe neurons are  
42 highly diverse in their projections, connectivity, and electrophysiological properties, and

43 are implicated in a wide breadth of behaviors and physiological processes [4, 8-16].  
44 Further, the raphe system receives monosynaptic input from up to 80 anatomical areas  
45 [8, 9]. As a result, a significant amount of work has focused on disentangling the  
46 functional and behavioral roles of serotonergic neurons. Several recent studies have  
47 suggested that serotonergic raphe neurons may be organized into functional  
48 subpopulations based on neuroanatomy, electrophysiology, and behavior [4, 12, 17-21].  
49 For example, two parallel sub-systems of serotonergic raphe neurons collateralize  
50 complementarily and are both activated by reward, yet have opposing responses to  
51 aversive stimuli and promote distinct behaviors [18]. Sparse neuron reconstructions in  
52 mice show that a single serotonin neuron can interconnect the olfactory bulb, piriform  
53 cortex, and anterior olfactory nucleus [19], demonstrating that a single serotonergic  
54 neuron can arborize several processing stages within the same sensory modality. Thus,  
55 determining the precise patterns of connectivity of single serotonergic neurons within  
56 and across the brain regions will be critical for understanding the seemingly  
57 heterogeneous effects of serotonergic systems.

58 Invertebrates are excellent models for studying the properties of individual  
59 neurons due to the wealth of identified neurons that can be consistently studied from  
60 animal to animal [22]. The fly olfactory system provides a numerically reduced model in  
61 which to study the detailed connectivity of an individual serotonergic neuron while  
62 minimizing inter-animal variability [23, 24]. Further, the genetic tractability and numerical  
63 simplicity of the fly enables the olfactory system to be studied at a single-cell resolution.  
64 Recently, a whole female adult fly brain electron microscopy volume (FAFB) was  
65 generated in which the connectivity of a neuron with its synaptic partners can be  
66 comprehensively determined at a single synapse resolution [25]. Taken together, these  
67 advantages position the fly as an ideal model to explore the nature of a single  
68 modulatory neuron's synaptic connectivity between individual neurons and cell classes,  
69 as well as within and across brain regions.

70 Flies detect volatile chemicals via an array of olfactory receptor neurons (ORNs)  
71 housed in sensillum on their antennae. Each ORN expresses 1-2 differentially tuned  
72 chemosensory receptor proteins, and ORNs expressing the same receptor proteins  
73 converge within sub-compartments of the antennal lobe (AL; first-order olfactory  
74 processing neuropil) called glomeruli. Olfactory information is carried to second-order  
75 processing centers including the lateral horn (LH) and mushroom bodies (MB) by  
76 uniglomerular and multiglomerular projection neurons (uPNs and mPNs, respectively)  
77 along the medial AL tract (mALT) [26-29]. Synaptic communication between all principal  
78 olfactory neuron types in the AL is refined by diverse populations of local interneurons  
79 (LNs) that support an equally diverse set of network computations [30-39].

80 The AL and LH also receive input from a variety of extrinsic neurons, including  
81 two broadly projecting serotonergic neurons, the "contralaterally-projecting, serotonin-  
82 immunoreactive deutocerebral neurons" (CSDns) [23, 24]. The CSDns are the sole  
83 source of synaptic serotonin in the AL and LH, and receive synaptic input in both  
84 neuropils [40-43]. However, the CSDns are by no means uniform. CSDn active zone

85 density varies across glomeruli [40] and a given odor can cause local excitation of  
86 CSDn branches in the LH, yet widespread inhibition in the AL [44]. This suggests that  
87 local synaptic connectivity supports different coding schemes across olfactory  
88 processing neuropil for this single serotonergic neuron [42, 44]. Furthermore, different  
89 subsets of principal olfactory neurons express distinct 5-HT receptor subtypes [45].  
90 Finally, the behavioral function of the CSDns varies with the odor identity and  
91 concentration tested, in some cases implying a suppression of odor-guided behavior  
92 and in others an enhancement [41, 46, 47]. Taken together, these studies suggest that  
93 even a single modulatory neuron can have heterogeneous connectivity within the  
94 networks that it targets. However, the organizing principles of the connectivity of single  
95 serotonergic neurons have not been comprehensively determined. Specifically, it is  
96 unclear how the connectivity of a single serotonergic neuron varies between specific  
97 neuron classes, within a neural network, or even across the different networks that it  
98 innervates.

99 To comprehensively study the connectivity of the CSDn at a single cell  
100 resolution, we used the FAFB electron microscopy volume [25] to fully reconstruct the  
101 CSDn in the AL and LH, identified individual synaptic partners across neuropil, and  
102 generated comprehensive connectomes of the CSDn within select glomeruli. While  
103 some coarse anatomical features of the CSDn are consistent across neuropil, we find  
104 that the overall connectivity of the CSDn is highly complex, as it differs within the AL as  
105 well as between the AL and LH. We show that within the AL, the CSDn targets local  
106 processing networks: it synapses extensively and reciprocally with subsets of local  
107 interneurons and receives glomerulus-specific input from principal olfactory neuron  
108 types. This pattern of organization is not conserved in the LH, where the connectivity of  
109 CSDn with principal LH cell types varies with transmitter content of synaptic partners.  
110 Lastly, we demonstrate that the CSDn receives previously undescribed top-down input  
111 from three populations of extrinsic neurons, including a population of mechanosensory  
112 neurons. Taken together, we establish a wiring logic in which a single serotonergic  
113 neuron selectively targets specific cell types within a sensory network, while integrating  
114 heterogeneous, reciprocal input from local networks and top-down input from extrinsic  
115 sources. This heterogeneity at the level of a single cell may therefore contribute an  
116 additional degree of complexity to the role of populations of modulatory neurons.

117

## 118 **Results**

### 119 **General morphological features of the CSDn are conserved across brain regions**

120 Our first goal was to systematically compare broad morphological characteristics  
121 such as branching density and distribution of synaptic sites of a single CSDn across and  
122 within brain regions. The somata of the two CSDns reside in the lateral cell cluster of  
123 each AL (Figure 1A). A single CSDn produces sparse processes on its primary neurite  
124 within the ipsilateral AL, then follows the medial AL tract (mALT) to the ipsilateral  
125 protocerebrum where it innervates the antler, superior lateral protocerebrum (SLP),  
126 mushroom body calyx (MBC), and lateral horn (LH). The CSDn then crosses the midline

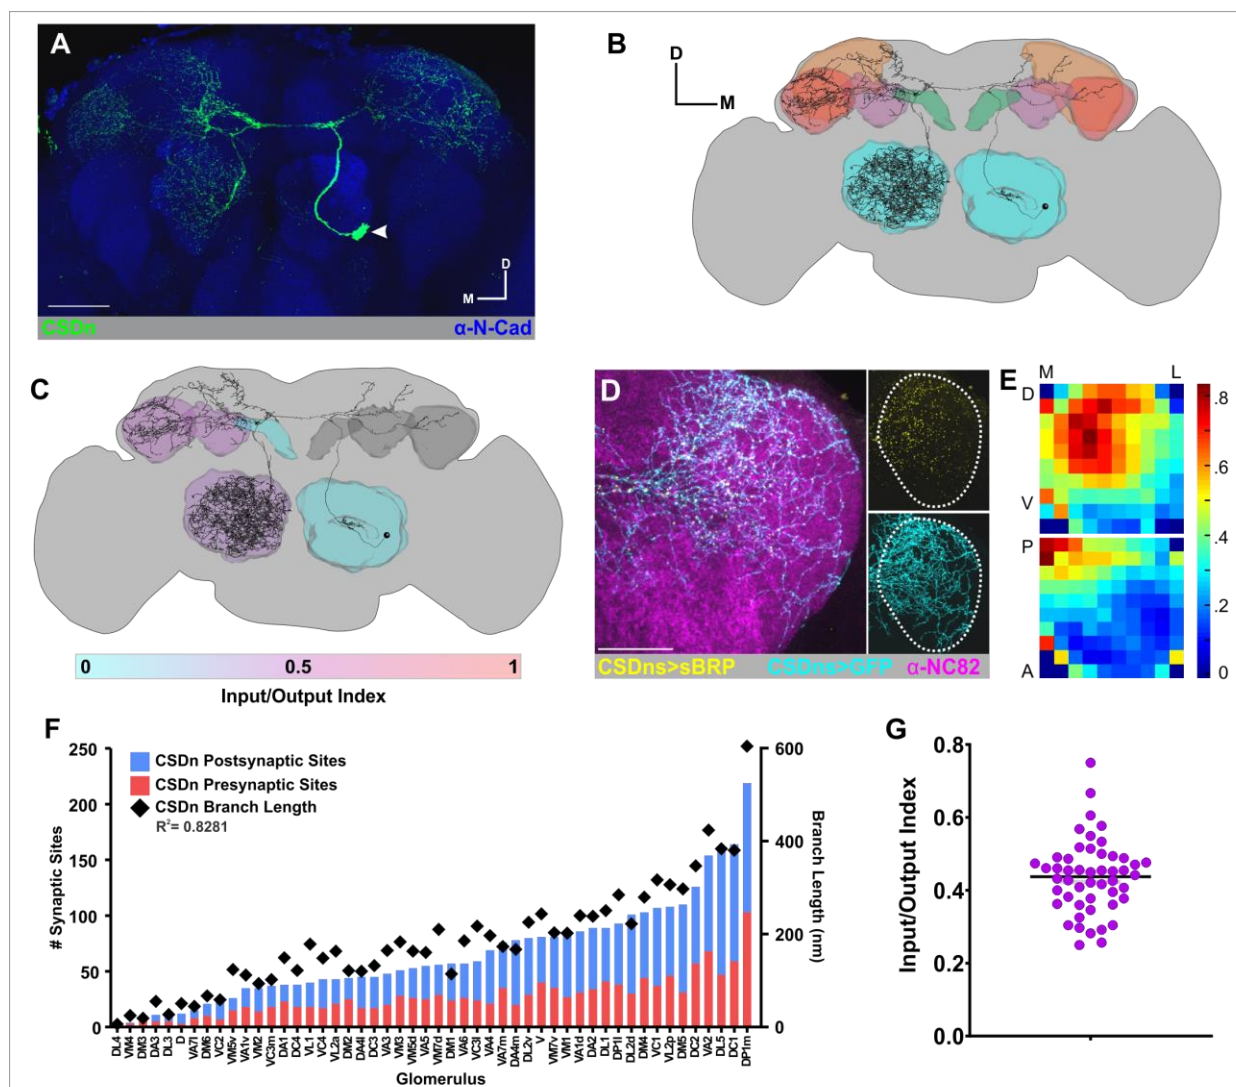

127 to innervate these same protocerebral regions on the contralateral side of the brain.  
 128 Finally, the CSDn projects along the contralateral mALT to densely innervate the  
 129 contralateral AL (Figure 1A, B).

130 Due to the intricacy and size of the CSDn, we focused our efforts on  
 131 reconstructing a single CSDn in the right hemisphere of the brain (i.e. CSDn soma in  
 132 the fly's left hemisphere, the "left-hand CSDn") where most neuronal reconstruction in  
 133 the FAFB dataset [25, 48-50] has occurred. We manually reconstructed over  $23 \times 10^6$   
 134 nm of cable which includes a complete reconstruction of the CSDn and its synaptic sites

135 in the ipsilateral AL, contralateral AL, contralateral MBC and contralateral LH (Figure  
136 1B). We used NBLAST [51] to geometrically compare our tracing to a skeletonized  
137 CSDn from a light microscopy image dataset [52] and obtained a similarity score of  
138 0.716, indicating a match (where 1 equals perfect alignment with dataset) (Figure 1 –  
139 figure supplement 1A). Despite functional differences in the organization of the AL and  
140 LH networks [53, 54], broad features of CSDn morphology and synapse distribution are  
141 similar across them. CSDn cable length per neuropil volume is similar in the AL (45.284  
142 nm/um<sup>3</sup>) and LH (38.832 nm/um<sup>3</sup>) respectively, despite the CSDn innervating the AL  
143 much more extensively than the LH, with  $17 \times 10^6$  nm of cable compared to  $6 \times 10^6$  nm  
144 in the LH. We did find, however, that the CSDn is sparser in the MBC, with a total of  $0.9$   
145  $\times 10^6$  nm of cable length and branching density of 8.792 nm/um<sup>3</sup> (Figure 1 – figure  
146 supplement 1C).

147 Expanding upon previous studies using transgenic markers [24, 40-42], we found  
148 that the CSDn has input and output sites mixed along its neurites in all olfactory  
149 neuropil, except for the ipsilateral AL and protocerebral region called the “antler” (Figure  
150 1B) which are postsynaptic. To determine if the ratio of pre- and post-synaptic sites of  
151 the CSDn differs across the contralateral AL, LH, and MBC, we calculated an  
152 “input/output index” ( $\#$  presynaptic sites / ( $\#$  presynaptic +  $\#$  postsynaptic sites)). All three  
153 neuropils have relatively similar input/output indices (ranging from 0.42-0.46; Figure 1C,  
154 Figure 1 – figure supplement 1C) and synaptic density (ranging from 0.76-1.02  
155 synapses/10 um; Figure 1 – figure supplement 1C). Taken together, this indicates that  
156 coarse traits, like total cable length and input/output index, are consistent across each  
157 olfactory network.

158 Within individual brain regions, however, the CSDn has non-uniform projections  
159 [24, 40, 47] and distribution of presynaptic sites. The number of CSDn presynaptic sites  
160 varies between AL glomeruli, yet is consistent for a given glomerulus across animals  
161 [40]. Furthermore, the distribution of the active zone marker Brp<sub>short</sub> [55-58] is most  
162 dense in the mediodorsal and posterior regions of the LH (Figure 1D, E). We therefore  
163 sought to determine if the balance of pre- and postsynaptic sites of the CSDn in the AL  
164 is also consistent across glomeruli and if the absolute number of pre- and postsynaptic  
165 sites scale with branch length as it does for global measures from the AL, LH, and MBC.  
166 We chose to focus on the AL because of its glomerular organization which allows us to  
167 easily compare discrete subregions as opposed to the LH and MBC in which subregions  
168 are less easily discernable. Within each glomerulus, we quantified the number of pre-  
169 and postsynaptic sites of the CSDn and calculated its branch length. We found that  
170 while the total number of pre- and postsynaptic sites on the CSDn varies across  
171 glomeruli, the “input/output index” for each glomerulus is fairly consistent (Figure 1F,G,  
172 Mean = 0.437, SEM = 0.014, Coefficient of Variation = 22.96%), and the number of pre-  
173 and postsynaptic sites scale with branch length ( $R^2 = 0.924$  and  $0.861$  for pre- and  
174 postsynaptic sites respectively; Figure 1 – figure supplement 2A,A’). We also found that  
175 the synaptic density across all glomeruli is significantly less variable for presynaptic  
176 sites than postsynaptic sites (Levene’s test for homogeneity of variance,  $p < 0.005$ ;  
177 Figure 1- figure supplement 2B). Finally, we found a weak correlation between branch  
178 length and glomerular volume (Figure 1 – figure supplement 2C), indicating that the

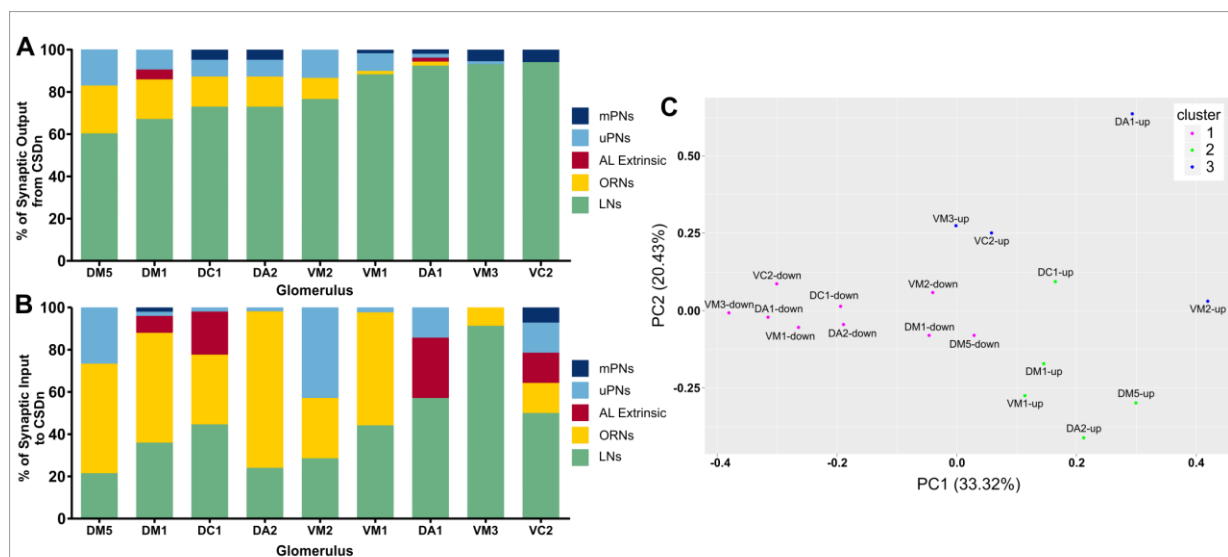

**Figure 2: The CSDn has distinct connectivity across glomeruli.** (A) Percent of input from the CSDn onto all postsynaptic partners reconstructed in 9 glomeruli. The CSDn predominantly targets LNs across all glomeruli. Glomerulus order based on ranked ordered amount of input from the CSDn to LNs. (B) Percent of input to the CSDn from all presynaptic partners reconstructed in 9 glomeruli. Composition of presynaptic targets within each glomerulus is more diverse than for CSDn output. (C) Synapse fractions segregate into 3 clusters in PC space, based on whether the fraction is for upstream partners (magenta) or downstream partners (green and blue) based on k-means clustering.

179 density of CSDn pre- and postsynaptic sites is consistent, based on branch length and  
 180 that glomerulus specific differences in synaptic density are due to density of innervation.

181

## 182 **CSDn connectomes across glomeruli are distinct**

183 The variation in CSDn pre- and postsynaptic density suggests that the specific  
 184 neurons with which the CSDn interacts may also vary across glomeruli. In the AL, the  
 185 composition of the neuronal population within each glomerulus (the “demographics”)  
 186 correlates with the odor tuning of the ORNs that innervate that glomerulus [59].  
 187 Glomeruli that receive input from more narrowly tuned ORNs are innervated by more  
 188 PNs relative to LNs, and glomeruli that receive input from more broadly tuned ORNs are  
 189 innervated by more LNs. Furthermore, the sensitivity of PNs to GABAergic inhibition  
 190 from LNs is inversely correlated to odor tuning [31], consistent with narrowly glomeruli  
 191 receiving less input from LNs. Since the CSDn receives input from ORNs and PNs in a  
 192 subset of glomeruli [40], we sought to systematically explore the differences in  
 193 glomerulus-specific demographics of its synaptic partners (Figure 2). We reconstructed  
 194 all of the CSDn’s presynaptic and postsynaptic partners to identification within 9  
 195 glomeruli: DA1, DA2, DC1, DM1, DM5, VC2, VM1, VM2, and VM3 (Figure 2 – figure  
 196 supplement 2,3). These glomeruli were chosen because they vary in their odor-tuning  
 197 (as measured by lifetime sparseness; [59]), number of CSDn synaptic sites, and CSDn  
 198 branch length (Figure 2 – figure supplement 1), thus are likely representative of AL  
 199 glomeruli. Thus we could determine if there is an obvious logic behind the synaptic  
 200 connectivity of the CSDn across glomeruli.

201 Despite the large differences in glomerulus-specific innervation density of the  
 202 CSDn (Figure 1F), the demographics of CSDn downstream synaptic partners are  
 203 relatively uniform across glomeruli (Figure 2A). Although the percent of output from the

204 CSDn onto ORNs, PNs, and extrinsic neurons in the 9 glomeruli varies, we found that  
205 60%-94% of the CSDn's downstream synaptic partners are LNs, regardless of odor  
206 tuning, and that lifetime sparseness does not correlate with CSDn output to LNs  
207 ( $R^2=0.003$ ,  $p=0.905$ ; Figure 2 – figure supplement 4A). For example, over 90% of the  
208 postsynaptic partners of the CSDn in DA1 and VM3 are LNs. However, DA1 has a  
209 lifetime sparseness of 0.98 and VM3 has a lifetime sparseness of 0.56 indicating that  
210 the downstream targets do not vary with tuning breadth of a given glomerulus. However,  
211 the proportion of CSDn synapses onto ORNs varies inversely with the proportion of  
212 CSDn synapses upon LNs ( $R^2=0.98$ ,  $p<0.001$ ; Figure 2 – figure supplement 4B).

213 In contrast, the demographics of upstream synaptic partners to the CSDn in each  
214 glomerulus are highly variable (Figure 2B). The neuron types which provide input to the  
215 CSDn do not correlate to glomerulus-specific CSDn innervation density or lifetime  
216 sparseness of the cognate ORNs. For example, VM2 and VM3 are both broadly tuned  
217 glomeruli (Figure 2 – figure supplement 1). However, LNs provide the largest fraction of  
218 input to the CSDn in VM2, whereas uPNs provide the most input in VM3. The CSDn  
219 receives most of its input from ORNs in both DA2 and VM1, which are narrowly tuned,  
220 yet in DA1 which is also narrowly tuned, the CSDn receives most of its input from LN  
221 subtypes (see below). We ran a principal component analysis (PCA) in which the first  
222 component is largely explained by opposing vectors of vLNs and ORNs and PC2 is  
223 largely explained by opposing vectors of “uncategorized LNs” and uPNs. However, we  
224 did not find that the demographics of synaptic partners covary as their eigenvectors are  
225 largely distributed throughout the PCA (Figure 2 – figure supplement 5A).

226 The high apparent degree of variability in the demography of input to the CSDn is  
227 consistent with our observation that the glomerulus-specific density of postsynaptic  
228 CSDn sites is more variable relative to the density of CSDn presynaptic sites (Figure 1 –  
229 figure supplement 2B). A PCA including all of the glomerulus specific sets of upstream  
230 and downstream partners (Figure 2C) confirms that the composition of upstream  
231 partners is more variable, as the mean distance between coordinates for upstream  
232 partner sets is significantly higher than between downstream partners sets (Figure 2 –  
233 figure supplement 5D;  $p=0.0007$ ; Student's t-test). In addition, the synapse fractions of  
234 downstream partner sets cluster together separately from the upstream partner sets  
235 which form two sub-clusters (Figure 2C; Figure 2 – figure supplement 5B). This  
236 indicates that the CSDn has distinct patterns of synaptic output and input across  
237 glomeruli. Overall, while the CSDn predominantly influences LNs, glomerulus specific  
238 input likely tempers this influence depending upon the odor that the fly encounters.

239

### 240 **The CSDn has distinct connectivity with LN types**

241 We found that the CSDn predominantly targets LNs within the nine glomeruli in  
242 which we reconstructed the CSDn's synaptic partners. However, LNs are extremely  
243 heterogeneous in their morphology, physiology, and transmitter profile [30-32, 34, 35,  
244 37-39, 60-62]. Thus, to establish a systematic framework for the connectivity of the  
245 CSDn to LNs, we determined the LN subtypes to which the CSDn is preferentially

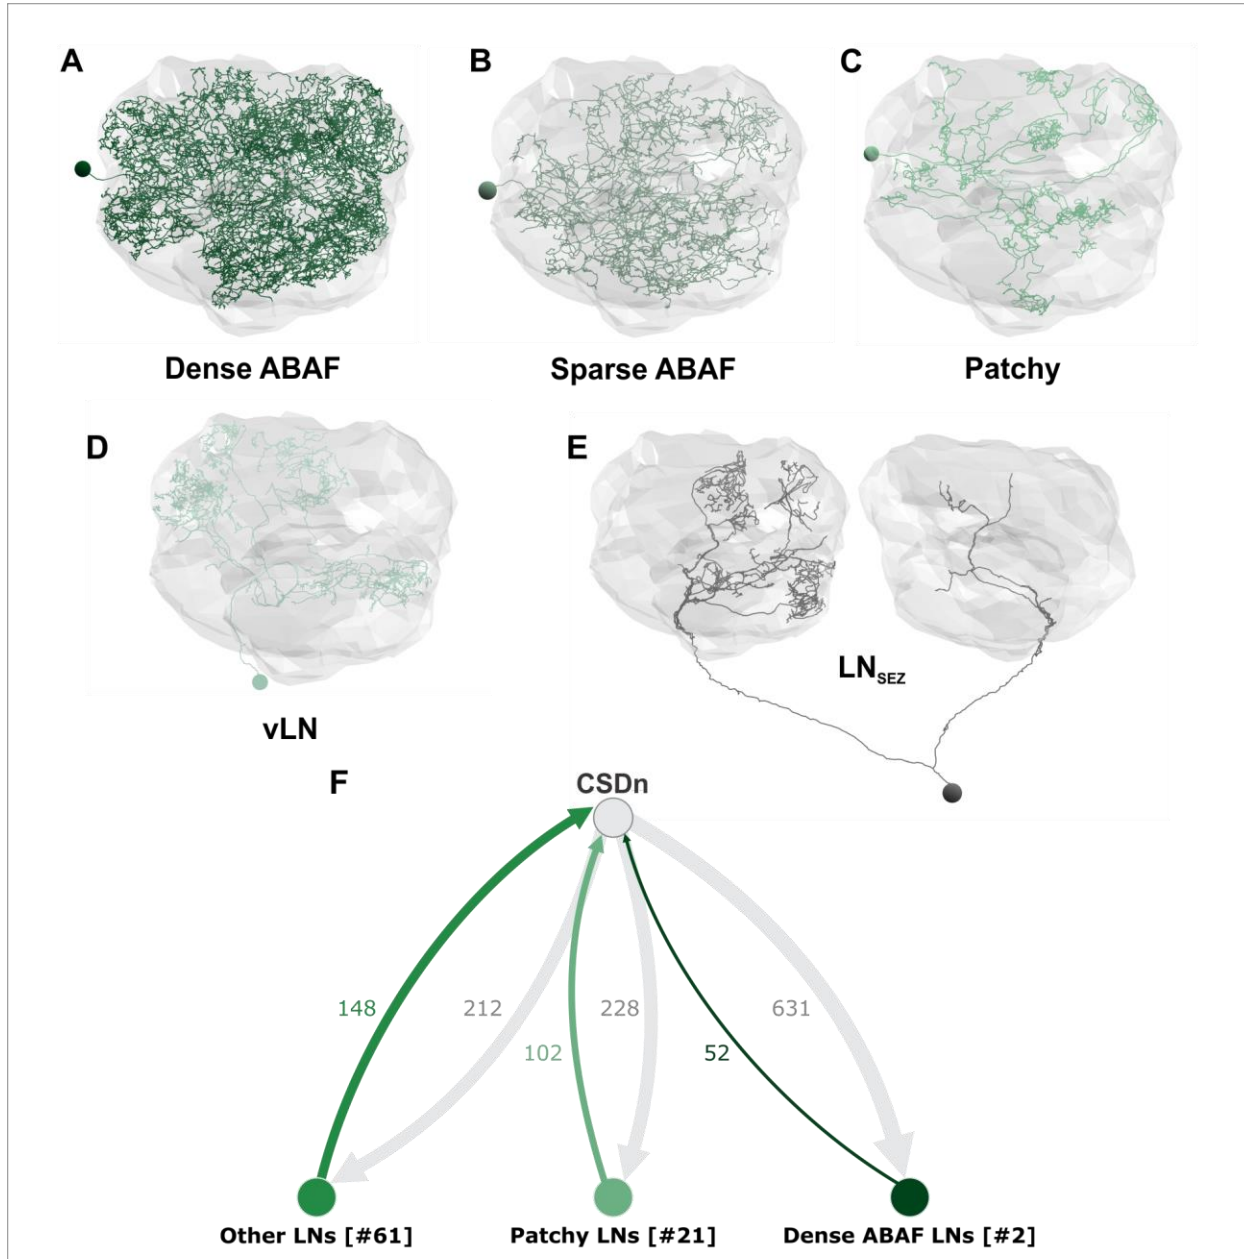

**Figure 3: The CSDn has distinct connectivity with LN sub-populations.** Examples of LNs with connectivity to the CSDn. (A) Dense ABAF LNs innervate ~50 glomeruli. (B) The Sparse ABAF also innervates ~50 glomeruli but has far less branchpoints compared to the dense ABAF. (C) Patchy LNs characteristic looping structure within the glomeruli that they innervate. (D) vLNs have their soma ventral to the AL and are likely glutamatergic. (E) AL projecting SEZ LNs ( $LN_{SEZ}$ ) have their somata ventral and project bilaterally to both ALs. These LNs resemble the Keystone LNs reconstructed in a larval EM dataset (Berck et al., 2016). (F) The CSDn is most strongly connected to two Dense ABAF LNs as well as Patchy LNs. The “Other LNs” group include  $LN_{SEZ}$ s, vLNs, and otherwise uncategorized LNs. “[#]” indicates number of neurons within a population. Synaptic connections derive from the 9 completely reconstructed glomeruli in Figure 2 and synaptic connections from other glomeruli found in the course of reconstructing the LN.

246

247

248

249

connected. The CSDn synapses with at least 84 LNs throughout the AL. Previous work has categorized LNs based on their morphology and the number of glomeruli that they innervate into the following subtypes: panglomerular, all but a few (“ABAF”), continuous,



250 patchy, oligoglomerular, LNs with somata in the subesophageal zone (SEZ) and ventral  
251 [30, 61, 63]; Figure 3A-E). Although we did not find evidence for the CSDn being  
252 strongly connected synaptically (>10 synapses) to oligoglomerular or panglomerular  
253 LNs, these LN types could be partially reconstructed neurons within the group of  
254 uncategorized LNs (see below) to which the CSDn is weakly connected but we did not  
255 classify further.

256 Despite the diversity of LN types, we found that 50-80% of the CSDn's output to  
257 LNs is directed onto two subtypes of LNs across the 9 glomeruli; two densely branching  
258 ABAF LNs which each innervate 48 and 49 glomeruli, respectively (Figure 3 – figure  
259 supplement 2) and patchy LNs which each innervate ~30 glomeruli [30]. The CSDn  
260 provides over 600 synapses to the two dense ABAF LNs, approximately one-third of its  
261 synaptic output within the AL and receives input from the ABAFs at over 50 synaptic  
262 sites (Figure 3F; Figure 3 - figure supplement 2). We identified and reconstructed  
263 another ABAF LN which innervates at least 44 glomeruli but branches far less  
264 extensively than the two densely branching ABAF LNs. Using a K-nearest neighbor  
265 analysis (KNN) we calculated the distribution of distances between branch points of a  
266 neuron and its neighboring branch points (see Methods). We found that the branch  
267 point distributions of the two dense ABAF LNs closely overlap, in contrast to the sparse  
268 ABAF LN which has a much larger range of branch point distributions and thus has far  
269 less overlap with the dense ABAF (Figure 3 – figure supplement 3). This indicates that  
270 the dense and sparse ABAF LNs indeed represent two separate sub-classes. Moreover,  
271 this sparse ABAF LN has little connectivity to the CSDn (Figure 3 - supplement 2A).

272 The CSDn is also highly connected to the patchy LNs which innervate sub-  
273 volumes, or “patches”, of individual glomeruli, and as a population tile across the  
274 entirety of the AL [30]. Before innervating a given glomerulus, patchy LNs have long,  
275 highly looping processes that lack pre- or postsynaptic sites, which further assisted in  
276 their identification. Although the biological significance of these convoluted processes is  
277 unclear, similar examples have been reported in *Drosophila* and other invertebrates [64-  
278 66]. Once within a glomerulus, a patchy LN branches extensively within a subregion of a  
279 glomerulus and produces many pre- and postsynaptic sites (Figure 3C; [30]). In contrast  
280 to the dense ABAF, the CSDn has 2:1 reciprocal connectivity to a population of at least  
281 21 patchy LNs (Figure 3F). KNN analysis supports the hypothesis that these patchy LNs  
282 belong to the same morphological subclass (Figure 3 – figure supplement 3C). For the  
283 remaining LNs, the CSDn has weak (<5 synapses) reciprocal synaptic connectivity with  
284 ventral LNs (Figure 3D; Figure 3 – figure supplement 1C), which are most likely  
285 glutamatergic [32, 61], as well as a pair of bilaterally projecting LNs whose somas are in  
286 the SEZ (“AL projecting SEZ LNs”; LN<sub>SEZ</sub>), similar to the “Keystone” LNs (Figure 3E)  
287 upon which the CSDn synapse in the larval *Drosophila* AL [63]. An additional 46  
288 unclassified LNs which were reconstructed from the 9 glomeruli are grouped as  
289 “uncategorized LNs” as they are not classified as ABAF, LN<sub>SEZS</sub>, patchy, or vLNs  
290 (Figure 3F; Figure 3 – figure supplement 1C). Collectively, the CSDn provides at least  
291 212 synapses to and receives at least 148 synapses from these LNs that are not ABAFs

292 or patchy LNs, although they are likely not a monolithic group. Taken together, these  
293 results suggest that while LNs are the major target of the CSDn in the AL, the CSDn  
294 preferentially targets one particular LN subclass, the dense ABAF LNs, and has  
295 reciprocal connectivity with the larger population of patchy LNs (Figure 3 – figure  
296 supplement 1B).

297

### 298 **CSDn connectivity varies across olfactory processing regions**

299 Individual serotonin neurons in mice and flies alike span several stages of  
300 olfactory processing [19, 23, 40], however it is unclear if the wiring logic of individual  
301 serotonergic neurons is conserved across brain regions. For instance, do serotonergic  
302 neurons interact with the same individual neuron across multiple brain regions? Are  
303 general connectivity rules maintained from one processing stage to the next? We began  
304 by asking if the connectivity of the CSDn to individual PNs differs across the AL and LH  
305 as both the CSDn and PNs span both brain regions. Previously published PN  
306 reconstructions [25, 50, 67] were grouped into three subtypes based on whether they  
307 were uniglomerular (uPN) or multiglomerular (mPN), and the AL tract along which the  
308 mPNs project, either mALT or mlALT [50]. In addition to the AL tract along which they  
309 project, mPNs functionally differ from each other in terms of the transmitter they express  
310 with mALT mPNs being cholinergic and mlALT mPNs being GABAergic [50, 68-70].  
311 Collectively, 78 mALT uPNs (of 149), 46 mALT mPNs, and 28 mlALT mPNs (of 197  
312 total mPNs) are synaptically connected to the CSDn across the AL and LH (Figure 4A-  
313 C). This is likely an underestimation of the total CSDn:PN connectivity in the AL, as not  
314 all PN dendrites were reconstructed to completion. However, any PN branches that  
315 synapse with the CSDn in the 9 glomeruli that we sampled were reconstructed to the  
316 primary process of the neuron (i.e. to identification).

317 We found that the three PN types have distinct connectivity with the CSDn from  
318 one another both within and across the AL and LH. For instance, of the different PN  
319 subtypes, the CSDn is most strongly connected to the uPNs as a population,  
320 maintaining reciprocal connectivity with 3:2 uPN:CSDn ratio in both the AL and LH  
321 (Figure 4D, D'). While most individual uPNs are weakly connected to the CSDn (<10  
322 synapses), a few individual uPNs are strongly connected. In particular, two DM5 uPNs  
323 have 16-18 synapses onto the CSDn in the AL, consistent with previous work using  
324 transgenic and physiological approaches demonstrating that DM5 PNs synapse with the  
325 CSDn [40]. The mALT mPNs also have balanced reciprocal synaptic connectivity with  
326 the CSDn in the AL, however, they have almost no connectivity with the CSDn in the LH  
327 (Figure 4D, D'). Finally, the CSDn has unidirectional connectivity with the mlALT mPNs  
328 in the AL with the CSDn providing input to, but not receiving input from them (Figure 4D;  
329 Figure 4 – figure supplement 2). Thus, similar to LNs, the connectivity of the CSDn with  
330 PNs varies across PN subtypes and varies between the AL and the LH. Even within a  
331 given glomerulus individual uPNs have different connectivity with the CSDn. For  
332 example, of the five DA2 uPNs, one synapsed upon the CSDn in the AL, two received  
333 synaptic input from the CSDn in the AL, one is reciprocally connected to the CSDn in

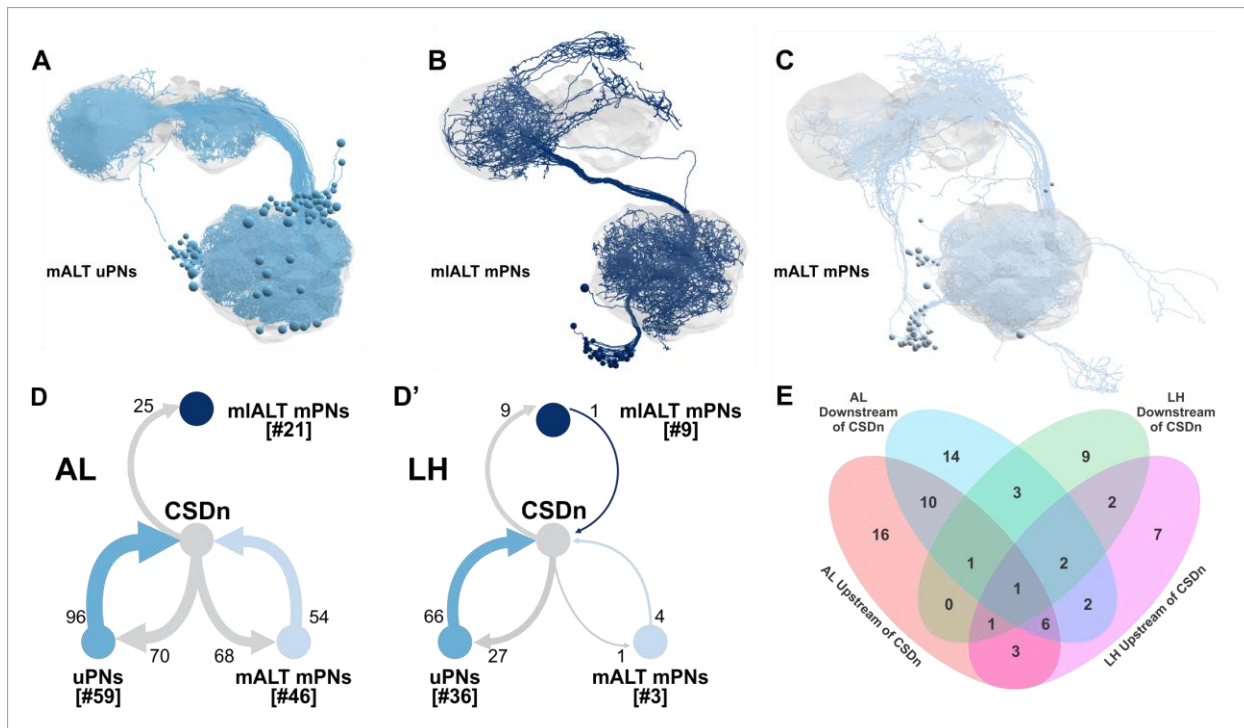

**Figure 4: CSDn Connectivity with PNs in the AL and LH.** EM reconstructions of PNs with connectivity to the CSDn (A) mALT uPNs, (B) mlALT mPNs, and (C) mALT mPNs. Number of synaptic connections of PN subtypes with the CSDn in the AL (D) and LH (D'). (E) uPNs have varied connectivity with the CSDn across the AL and LH. Number represents number of neurons, rather than synapse counts.

334 the LH, and a fifth receives input from the CSDn in both brain regions (Figure 4 - figure  
 335 supplement 1). The uPNs from the same glomerulus can differ in their connectivity  
 336 within the AL [66] and MBC [71], and it appears that this feature extends to the CSDn as  
 337 well.

338 To determine if the CSDn maintains its connectivity to individual neurons across  
 339 brain regions, we asked if the CSDn is synaptically connected to the same individual  
 340 uPNs in both the AL and LH. Although the CSDn could be connected to a given PN  
 341 within both the AL and the LH, the connectivity relationship of a given uPN is rarely  
 342 conserved across these processing stages (Figure 4E). For instance, in the AL there  
 343 are 21 uPNs that receive synaptic input from the CSDn but are not reciprocally  
 344 connected. Of these 21 uPNs, only 2 maintain this relationship in the LH. Thus, the  
 345 CSDn has heterogeneous synaptic connectivity to individual neurons across processing  
 346 stages of the olfactory system. Furthermore, a single serotonergic neuron can be  
 347 differentially connected to “equivalent” neurons within (i.e. uPNs from the same  
 348 glomerulus) and between multiple processing stages.

349 Finally, we sought to determine if broad features of CSDn connectivity to  
 350 principal neuron types in the AL are maintained for the principal neuron types of the LH.  
 351 While the CSDn primarily targets LNs within the AL, it has extensive connectivity with a  
 352 diverse set of neurons within the LH in addition to PNs. Although we did not  
 353 comprehensively reconstruct all of the synaptic partners of the CSDns within the LH, we  
 354 were able to leverage a rich dataset of previously traced neurons [48-50] to subsample  
 355 the populations of cells to which the CSDns are connected. There are at least 82 cell

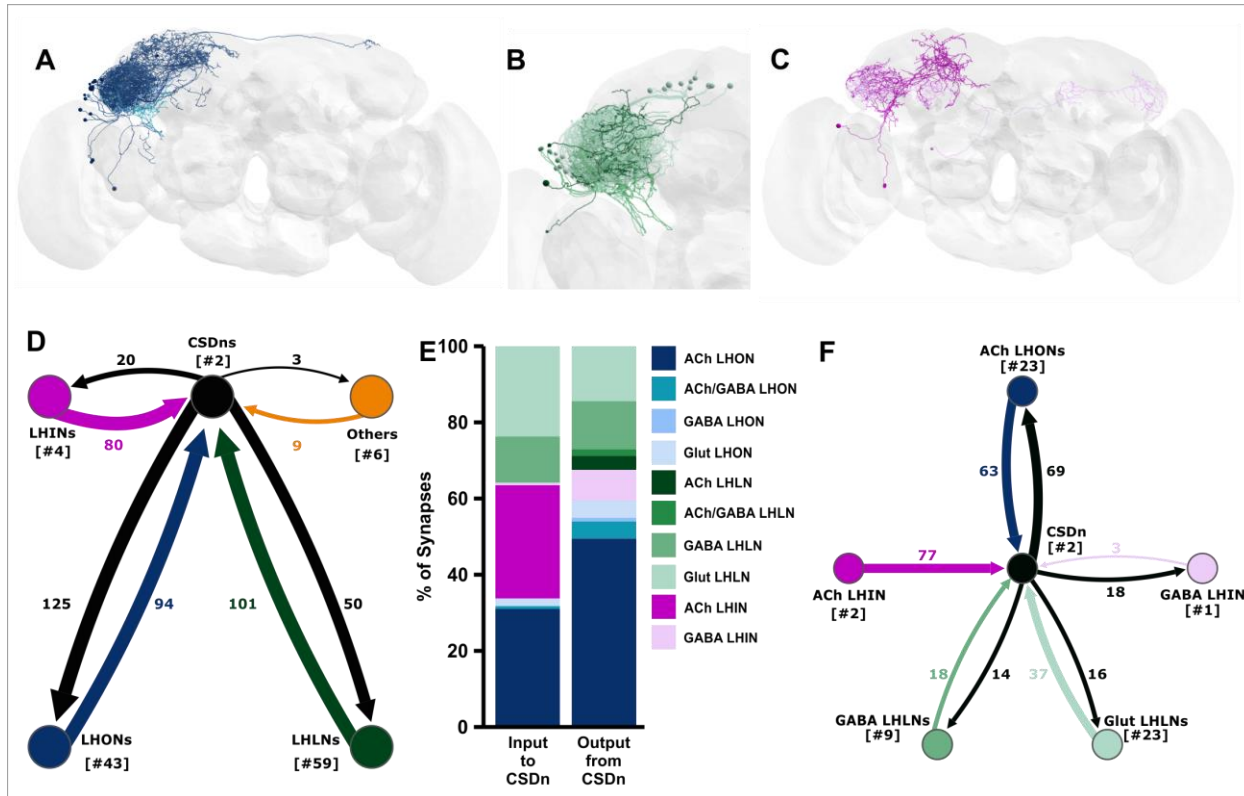

**Figure 5: CSDn Connectivity with Lateral Horn Neurons.** EM reconstruction of (A) LHONs, (B) LHLNs, and (C) LHINs that have connectivity with both CSDns. Colorization based on transmitter content (see E). (D) The CSDn reciprocally connectivity to each class of LH neurons. (E) Percent of input to/from the CSDns onto populations of lateral horn neurons. The CSDns have the most connectivity to and from cholinergic LHONs followed by glutamatergic and GABAergic LHLNs. (F) Connectivity of LH neuron types that are strongly connected based on transmitter content.

356 types of lateral horn neurons [48] which can be classified into three broad anatomical  
 357 types; LH output neurons (LHONs), LH local neurons (LHLNs) and LH input neurons  
 358 (LHINs). These can be further subdivided based on cell body cluster location (anterior  
 359 ventral; AV, anterior dorsal; AD, posterior ventral; PV and posterior dorsal; PD) and their  
 360 expression of acetylcholine, GABA, or glutamate [48-50]. Both CSDns are synaptically  
 361 connected to neurons from all three categories (Figure 5A-D) and the strength of  
 362 specific relationships, as well as the degree to which each relationship is symmetrical,  
 363 varies with putative transmitter (Figure 5 – figure supplement 1). The CSDns are most  
 364 strongly reciprocally connected to cholinergic LHONs, GABAergic LHLNs, and  
 365 glutamatergic LHLNs (Figure 5E, F). Although the CSDns have mostly sparse (between  
 366 1-10 synapses) connectivity to individual LH neurons, the CSDns are strongly  
 367 connected to individual LHINs, receiving strong synaptic input from two cholinergic  
 368 LHINs and providing strong synaptic input to a GABAergic LHIN (Figure 5C, E, F).  
 369 Thus, the general connectivity logic of the CSDn appears to differ between the AL and  
 370 LH. While the CSDn connectivity in the AL is highly biased towards LNs, it has more  
 371 distributed connectivity across principal cell types in the LH, with some exceptions, such  
 372 as individual LHINs.

373

374 **The CSDn receives abundant synaptic input from distinct populations of**  
 375 **protocerebral neurons**  
 376

377 While CSDn processes have a mixture of pre- and postsynaptic sites in olfactory  
 378 neuropils, CSDn processes are almost purely postsynaptic within a protocerebral region  
 379 called the antler (ATL) (Figure 2C). We next asked what neurons provide strong  
 380 synaptic input to the CSDn in the ATL. We reconstructed neurons that provide synaptic  
 381 input to the CSDn in the ATL and identified a population of 10 morphologically similar  
 382 neurons that collectively provide over 240 synapses to both CSDns in the ATL, LH, and  
 383 several other protocerebral regions (Figure 6A; Figure 6 – figure supplement 1B). These  
 384 neurons have their somata near the LH, project ventrally into the ipsilateral wedge  
 385 where they branch extensively before projecting back dorsally, crossing the midline and  
 386 then projecting ventrally into the contralateral wedge. The descending processes in  
 387 each hemisphere project anteriorly into the anterior ventrolateral protocerebrum and  
 388 medially into the saddle (Figure 6 – figure supplement 1C,D,E). These wedge projection  
 389 neurons (WPNs) are morphologically similar to a population of unilaterally projecting  
 390 WPNs [72] and have also been described in prior analyses of clonal units [73]. Due to  
 391 their projections to both brain hemispheres, we refer to these WPNs as “Bilaterally  
 392 projecting WPNs” (WPN<sub>B</sub>s). Consistent with a role in processing mechanosensory input  
 393 to the antennae, the WPN<sub>B</sub>s receive a large amount of synaptic input within the lateral

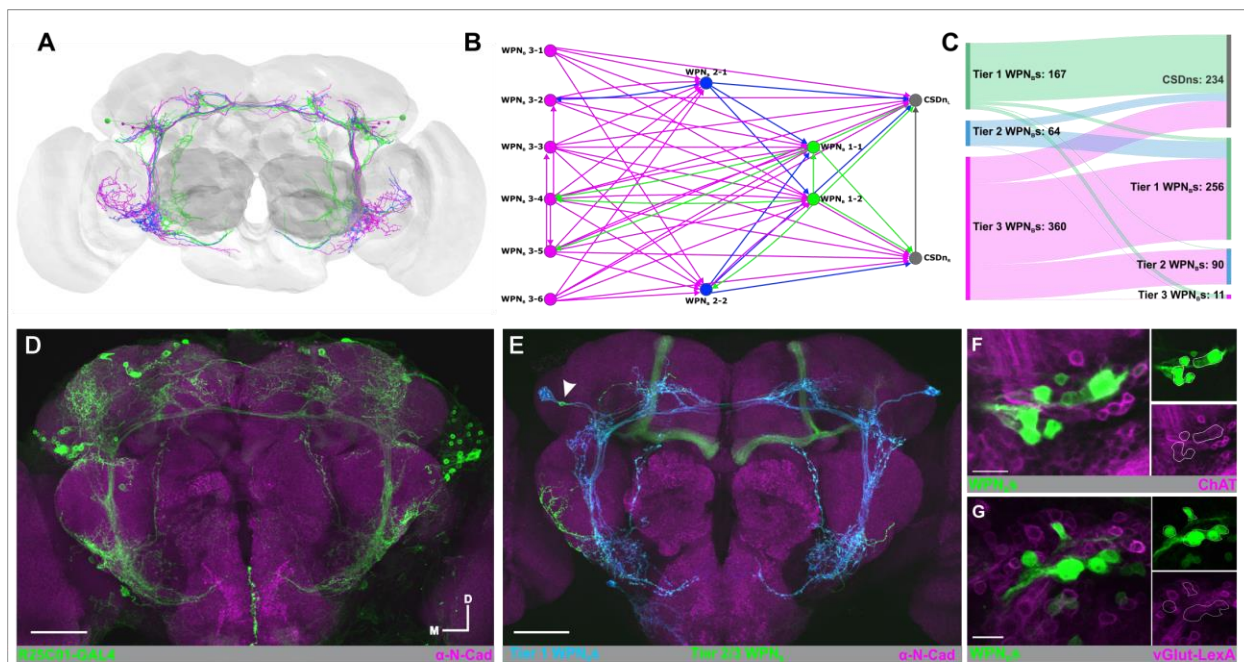

**Figure 6: WPN<sub>B</sub>s provide top-down input to the CSDn.** (A) EM reconstruction of 12 WPN<sub>B</sub>s that provide a top down input to the CSDn in the antler and portions of the protocerebrum. (B) The WPN<sub>B</sub>s provide input to the CSDns in a 3-tiered, feed-forward network where the Tier 1 WPN<sub>B</sub>s (green) are morphologically distinct from Tier 2 (blue) and Tier 3 (magenta); see also Figure 6 - figure supplement 1. (C) Tier 3 WPN<sub>B</sub>s provide strong input to the Tier 1 and Tier 2 WPN<sub>B</sub>s as well as the CSDn. (D) R25C01 driven expression of GFP (green) includes populations of WPN<sub>B</sub>s. (E) MultiColor FlipOut of R25C01-GAL4 highlights the expression of the two Tier 1 WPN<sub>B</sub>s (blue) and a Tier 2/3 WPN<sub>B</sub> (green, arrow). N-Cadherin delineates neuropil (magenta). (F) Some WPN<sub>B</sub>s' somata (green; R25C01-GAL4) colocalize with ChAT (magenta) Trojan-LexA::QFAD protein-trap but not vGLUT (G; magenta) Trojan-LexA::QFAD protein-trap. Scale bars D,E = 50 μm, F,G = 20 μm.

394 portion of the ipsilateral wedge (Figure 6- figure supplement 1C',D',E'), a second-order  
395 mechanosensory center [72, 74-78]. It should be noted that there are more than 10  
396 WPN<sub>B</sub>s in total as we did identify other WPN<sub>B</sub>s that did not provide synaptic input to the  
397 CSDns (data not shown).

398 The WPN<sub>B</sub>s form a three-tiered feedforward network in which subsets of WPN<sub>B</sub>s  
399 provide synaptic input to WPN<sub>B</sub>s in the next tiers but the subsequent tiers provide little,  
400 if any, feedback to the WPN<sub>B</sub>s from which they receive input (Figure 6B,C). We further  
401 classified the WPN<sub>B</sub>s based on their position within this connectivity network as WPN<sub>B</sub>1  
402 (two neurons), WPN<sub>B</sub>2 (two neurons) and WPN<sub>B</sub>3 (six neurons). The WPN<sub>B</sub>1s are  
403 morphologically distinct from WPN<sub>B</sub>2 and WPN<sub>B</sub>3 neurons as they have an additional  
404 anterodorsal projecting branch that extends from the medial saddle branch and their cell  
405 bodies are larger than the other WPN<sub>B</sub>s (Figure 6A, Figure 6 – figure supplement 1C).  
406 Using the Multi-Color Flip-Out technique [79], we identified a GAL4 line that is expressed  
407 by both WPN<sub>B</sub>1s and a subset of the WPN<sub>B</sub>2/3s (Figure 6D, E). We then combined this  
408 GAL4 with either a *Cha*<sup>M104508</sup>-LexA::QFAD or a *VGlut*<sup>M104979</sup>-LexA::QFAD protein-trap  
409 line [80] and found that many of the WPN<sub>B</sub>s in this GAL4 line are cholinergic, but none  
410 are glutamatergic (Figure 6F,G). The WPN<sub>B</sub>s have weak, non-directionality selective  
411 wind responses [72] suggesting that these neurons could be relaying mechanosensory  
412 information to the CSDns. In the process of reconstructing the WPN<sub>B</sub>s, we also  
413 identified an additional unilaterally projecting protocerebral neuron which provides at  
414 least 90 synapses to both CSDns in the ATL, SMP, and SLP (Figure 6 – figure  
415 supplement 2).

416 Finally, we identified a set of four protocerebral neurons that project into the AL  
417 where they synapse extensively upon the CSDn. These neurons have their somata  
418 along the dorsal midline of the brain, project laterally into the superior medial and  
419 intermediate protocerebra and ventrally, with one branch extending into the SEZ and  
420 another into the ipsilateral AL (Figure 7A). Based on their projections, we refer to these  
421 neurons as the “SIMPAL” (Superior Intermediate/Medial Protocerebra to Antennal Lobe)  
422 neurons. The SIMPAL neurons innervate ~23 glomeruli before crossing the antennal  
423 commissure into the contralateral AL (Figure 7A; Figure 7 – figure supplement 1).  
424 Collectively, these extrinsic neurons provide at least 188 synapses to the left-hand  
425 CSDn (Figure 7C). We found connectivity from the SIMPAL neurons to the other, right-  
426 hand CSDn (Figure 1 – figure supplement 1B), but did not quantify synapses because it  
427 is not fully reconstructed in the AL. Interestingly, we found that the SIMPAL neurons are  
428 strongly connected to the left-hand CSDn in six glomeruli in which the ORNs respond to  
429 attractive food odors (Figure 7B; Figure 7 – figure supplement 1), in particular, DP1m,  
430 DP1l and DC1 with 10-25 synapses in each. This suggests that the influence of the  
431 SIMPAL neurons on the CSDn is non-uniform, localized and potentially within the  
432 context of food attraction. We also found that the SIMPAL neurons receive significant  
433 input from the dense ABAF LNs (Figure 7D) and most strongly in the same glomeruli in  
434 which the SIMPAL neurons provide the greatest synaptic input to the CSDn (Figure 7E).  
435 This suggests that the CSDn and the SIMPAL neurons are reciprocally connected,

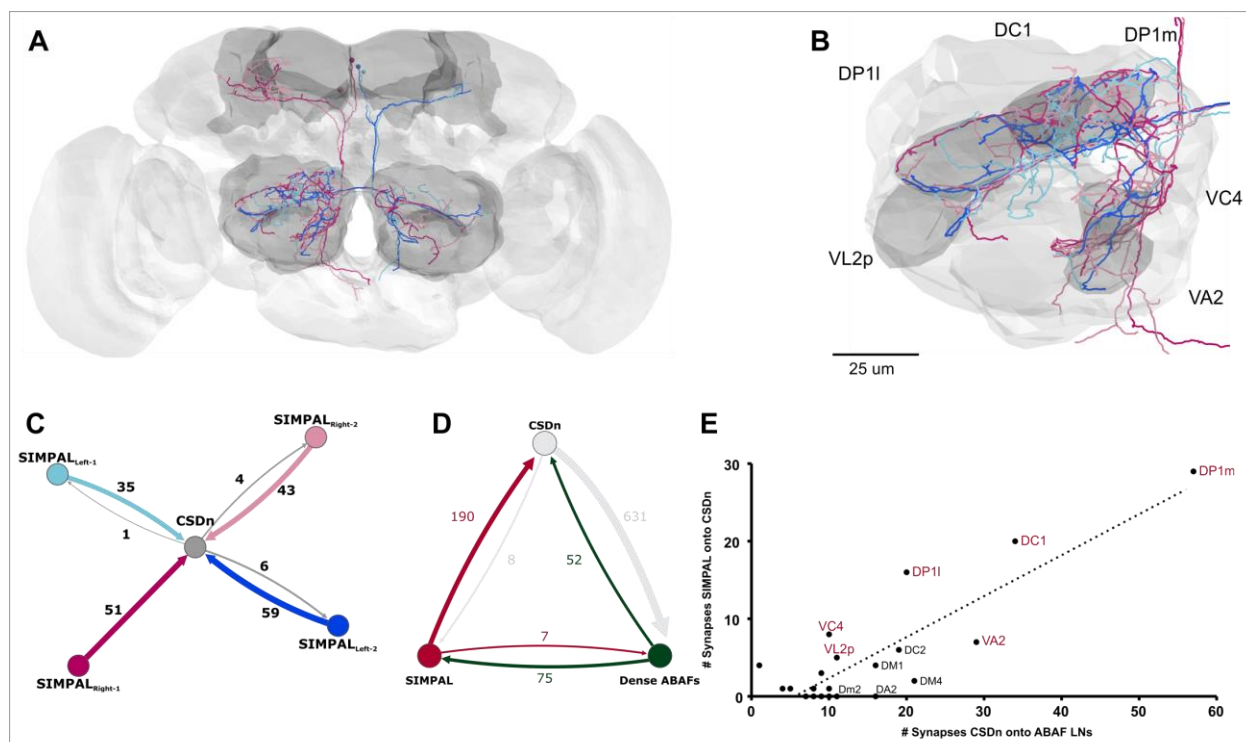

**Figure 7: Novel Extrinsic Input from the SIMPAL neurons.** (A) EM reconstruction of the four SIMPAL neurons which provide strong input (>10 synapses) to the CSDns in food odor-associated glomeruli (B) including DC1, DP1l, DP1m, VA2, VC4, and VL2p. (C) Connectivity of individual SIMPAL neurons to the CSDn is predominantly non-reciprocal. (D) The CSDns, Dense ABAF LNs, and SIMPAL neurons form a feedback loop suggesting the CSDn may influence the SIMPAL neurons polysynaptically. (E) The CSDn provides strong input to the ABAF LNs in the 6 food-odor associated glomeruli in which the SIMPAL neurons synapse upon the CSDn.

436  
437 although any influence of the CSDn on the SIMPAL neurons would be polysynaptic via  
438 the ABAF LNs.

### 439 440 **Replication of connectivity principles across animals**

441 While this manuscript was in preparation, a preprint describing a second dense  
442 reconstruction of a portion of a *Drosophila* central brain (called the “Hemibrain”) was  
443 made publicly available [81]. Many of the synaptic partners and connectivity  
444 relationships we found in the FAFB dataset were confirmed by the hemibrain dataset.  
445 We have included Body IDs (Figure 7- figure supplement 2) of neuron types in the  
446 Hemibrain that we describe from FAFB, although this list is not comprehensive. Thus,  
447 the broad patterns of connectivity that we describe for the CSDn are likely conserved  
448 across individual animals.

### 449 450 **Discussion**

451 Heterogeneous synaptic connectivity and cell class-specific serotonin receptor  
452 expression both contribute to the complex effects of serotonin on olfactory processing  
453 and behavior. Large scale, whole brain EM datasets [82-86], can provide a  
454 comprehensive understanding of the synaptic connectivity of individual serotonergic  
455 neurons within and across networks and thus can inform predictions about the function  
456 of serotonin within discrete networks. In this study, we used a whole brain EM dataset to

457 reconstruct a broadly projecting, identified serotonin neuron within the olfactory system  
458 of *Drosophila*, and determine its synaptic connectivity at a single-cell resolution within  
459 and between olfactory networks. Across glomeruli, the CSDn receives synaptic input  
460 from distinct combinations of olfactory neuron subpopulations, while uniformly providing  
461 synaptic input predominantly to specific subpopulations of LNs. Furthermore, the CSDn  
462 has a distinct wiring logic between the AL and LH, even establishing different  
463 connectivity relationships with the same uPN within each olfactory neuropil. Lastly, we  
464 identified neuron populations extrinsic to the olfactory system which provide strong input  
465 to the CSDn at locations within the protocerebrum and in select food-associated AL  
466 glomeruli, respectively. Population-level diversity and heterogeneity allow modulatory  
467 neurons to influence a diverse range of behaviors, often in a context-dependent manner  
468 [3-5, 8-16, 87, 88]. Our study illustrates the extent to which a single serotonergic neuron  
469 can have distinct connectivity within and across olfactory brain regions. These distinct  
470 patterns of connectivity likely allow modulatory neurons to simultaneously integrate local  
471 network information with extrinsic input to influence multiple stages of sensory  
472 processing.

473

#### 474 **A single modulatory neuron has heterogeneous connectivity within and between** 475 **sensory processing stages.**

476 The influence of serotonin and serotonergic neurons can be remarkably complex  
477 within a neural network. Within the olfactory system of vertebrate and invertebrates,  
478 serotonin can have stimulus-specific effects on odor-evoked responses or affect only a  
479 subset of a given neuron class [89-94], likely due to polysynaptic consequences of  
480 modulation and the diversity of serotonin receptors expressed in olfactory networks [45,  
481 95-101]. For instance, serotonin differentially causes direct and polysynaptic excitation  
482 of mitral cells in the main olfactory bulb [102-104], yet direct and polysynaptic inhibition  
483 of mitral cells in the accessory olfactory bulb [105]. Furthermore, the combined release  
484 of serotonin and glutamate from dorsal raphe neurons differentially affects mitral cells  
485 and tufted cells in the main olfactory bulb, decorrelating odor-evoked responses of  
486 mitral cells and enhancing the odor-evoked responses of tufted cells [103]. This could  
487 enhance the discriminability of mitral cell odor representations while simultaneously  
488 enhancing the sensitivity of tufted cells, thus allowing simultaneous modulation of  
489 different stimulus feature representations. We found that the CSDn is differentially  
490 connected to distinct LN and PN subtypes (Figures 3 and 4), and LN and PN subtypes  
491 in *Drosophila* have different serotonin receptor expression patterns [45]. Thus, the  
492 combined complexity of cell class-specific receptor expression and heterogeneous  
493 synaptic connectivity likely underlie the seemingly variable effects of serotonin on  
494 olfactory processing.

495 Single serotonergic neurons can span sensory networks within the same  
496 modality and therefore have the potential to modulate different processing stages  
497 simultaneously. Recent work mapping the projection patterns of 50 serotonergic Raphe  
498 neurons demonstrated that similarly to the CSDn, a single neuron can target several



499 olfactory areas including the main olfactory bulb, accessory olfactory bulb, and piriform  
500 cortex [19]. The degree to which the influence of a single serotonergic neuron is  
501 conserved across processing stages is unknown, however work in mice suggests that  
502 the functional roles of serotonergic neurons can differ between networks. Raphe  
503 stimulation differentially affects the odor-evoked responses of mitral and tufted cells in  
504 the main olfactory bulb [103] yet only affects spontaneous activity rather than the odor-  
505 evoked responses of single units recorded in primary piriform cortex [106]. Consistent  
506 with the idea that serotonin may play different functional roles across processing stages,  
507 we found several differences in the general connectivity rules of a single serotonergic  
508 neuron between olfactory processing stages. In the AL, the CSDn provides  
509 concentrated input to subsets of LNs (Figure 3), however CSDn input to LHLNs is far  
510 more diffuse (Figure 5). The degree to which the CSDn synapses with different  
511 populations of PNs also differs between the AL and LH (Figure 4). For instance, the  
512 CSDn is reciprocally connected to uPNs in both the AL and LH, but rarely to the same  
513 uPNs across both regions. Furthermore, the CSDn has relatively low connectivity to  
514 mPNs in the LH compared to the AL, suggesting that it preferentially targets these  
515 neurons at one processing stage. Recently it was demonstrated that local synaptic input  
516 allows the CSDn to exhibit odor invariant inhibition in the AL, yet odor and region-  
517 specific excitation in the LH [44]. This, in combination with our observation that CSDn  
518 connectivity differs between the AL and LH, suggests that single serotonergic neurons  
519 likely play different functional roles across processing stages.

520

### 521 **Modulatory neuron connectivity based on odor coding space.**

522 Topographical representations of stimulus features (such as stimulus identity or  
523 location) are a fundamental property of sensory systems [107-110] and overlaid upon  
524 these sensory maps are the differential projections of modulatory neurons. For instance,  
525 the density of serotonergic innervation varies between glomerular layers of the olfactory  
526 bulb [111-113] and between different glomeruli [47] and even subregions of single  
527 glomeruli in the AL [43, 114]. Although CSDn active zone density varies across  
528 glomeruli (Figure 1F; [40]), the overall demographics of CSDn postsynaptic partners  
529 were reasonably consistent across glomeruli regardless of odor tuning, with LNs being  
530 the predominant target (Figure 2A). This complements previous anatomical and  
531 physiological studies showing that GABAergic LNs synapse reciprocally with the CSDn  
532 [40], that LNs as a whole population express all five serotonin receptors [45], and the  
533 CSDn monosynaptically inhibits a population of AL LNs [42]. Here, we demonstrate the  
534 specific LN types with which the CSDn is preferentially connected, providing strong  
535 unidirectional input to densely branching ABAF LNs and reciprocal connectivity to  
536 patchy LNs (Figure 3F). Although we did not fully reconstruct the synaptic partners of  
537 the different LN subtypes, LNs synapse upon many principal neurons within the AL and  
538 support a wide range of neural computations within the AL [31-33, 35, 37-39, 62, 115].  
539 By having different synaptic connectivity with specific LN subtypes, the CSDn may

540 preferentially influence or actively participate in select neural computations that may be  
541 supported by these different LN types.

542 What then is the significance of the non-uniform glomerular innervation of the  
543 CSDn? The number of CSDn active zones within a glomerulus depends entirely upon  
544 CSDn cable length (Figure 1F), and the combination of synaptic inputs to the CSDn  
545 from ORNs, PNs, and LNs is heterogeneous across glomeruli (Figure 2B). However, the  
546 glomerulus-specific sets of neurons providing input to the CSDn are not correlated to  
547 tuning breadth alone or the density of CSDn innervation within a given glomerulus.  
548 Many odors inhibit the CSDn, with inhibition scaling with the degree to which the AL is  
549 activated [42]. Glomerulus-specific differences in input demographics suggest that the  
550 CSDn may further integrate local synaptic input within the AL in an odor-specific  
551 manner. For instance, ~50% of the input to the CSDn in VM1 is from ORNs, compared  
552 to ~90% of input in VM3 originating from LNs. Thus, the balance of excitation and  
553 inhibition experienced by the CSDn, and thus the influence of the CSDns on olfactory  
554 processing, likely depends in part on the odors that are currently being encountered.  
555 Alternatively, variation in input to the CSDn across glomeruli may serve to provide a  
556 broad sampling of network activity, that can be superseded in a context-dependent  
557 manner, for example, in the case of receiving input from a strongly connected partner  
558 such as the SIMPAL neurons or specific LN types.

559

### 560 **The CSDn as an intrinsic and extrinsic modulatory neuron**

561 Modulatory neurons can act in either an intrinsic or extrinsic capacity [116, 117].  
562 Intrinsic modulatory neurons receive input within the neural networks that they target  
563 and thus their influence is dependent upon recent network history. The activity of  
564 extrinsic modulatory neurons, on the other hand, is regulated by neurons outside of their  
565 target network, and thus they provide information about ongoing activity from other  
566 neural networks. In this manner, the CSDn serves as both an intrinsic and extrinsic  
567 modulatory neuron, as it has both diffuse reciprocal connectivity with the AL and LH,  
568 and receives strong, top-down input from neurons outside of these networks.

569 One source of top-down input to the CSDns is the WPN<sub>B</sub>s which form a feed-  
570 forward, hierarchical network of input (Figure 6). All three tiers within the hierarchy of  
571 the WPN<sub>B</sub>s provide input to the CSDns. However, tier 1 WPN<sub>B</sub>s integrate input from the  
572 remaining tiers and provide the greatest amount of synaptic input to the CSDns (Figure  
573 6B, C). While the WPN<sub>B</sub>s are weakly activated by lateral wind input, many WPN types  
574 that show distinct tuning to wind stimuli [72]. As a population, the WPNs likely encode  
575 many features of mechanosensory input, including wind stimuli, which can be integrated  
576 with olfactory cues to locate and orient to food and mates. Each WPN<sub>B</sub> tier may  
577 therefore provide information about different aspects of ongoing mechanosensory input  
578 to the antennae, such as direction, intensity, or vibration frequency. Furthermore, the  
579 positioning of their input along the main process, where the CSDn branch diameter is  
580 relatively wide [44], may allow the WPN<sub>B</sub>s to provide input that can spread to CSDn  
581 processes across olfactory neuropils.

582 The CSDn also receives strong synaptic input within the AL from four  
583 protocerebral neurons, the “SIMPAL” neurons (Figure 7). Although the role of the  
584 SIMPAL neurons is not known, they provide their greatest input to the CSDn in  
585 glomeruli that are tuned to attractive food odors such as limonene (DC1; [118]), acetic  
586 acid (DP1l; [119]), apple cider vinegar (DP1m, VA2; [120]), 2,3 butanedione (VA2; [120,  
587 121]), ethyl lactate (VC4; [122]), and 2-oxovaleric acid (VL2p; [123, 124]). The SIMPAL  
588 neurons may affect the influence of the CSDn during the processing of food odors.  
589 Although the CSDn has almost no direct synaptic feedback to the SIMPAL neurons,  
590 they likely provide polysynaptic feedback via the ABAF LNs in these food responsive  
591 glomeruli. Nevertheless, the influence of the SIMPAL neurons upon the CSDn is likely  
592 constrained to the AL and tempered by ongoing network dynamics. In contrast, the  
593 WPN<sub>BS</sub> synapse upon the CSDns at multiple locations throughout the protocerebrum  
594 along the widest CSDn process, potentially allowing for greater influence over CSDn  
595 compartments.

596

### 597 **Concluding remarks**

598 From the connectivity of a single serotonergic neuron, we can draw several  
599 parallels to broad organizational principles observed in larger populations of  
600 serotonergic neurons. As a population, serotonergic raphe neurons integrate input from  
601 80 anatomically distinct areas [8, 9, 11] which allow them to respond to a diverse set of  
602 stimuli. Different populations of dorsal raphe neurons can respond to immediate events  
603 such as reward, punishment or both [18], in some cases by altering different features of  
604 their spike patterning [125]. The activity of serotonergic neurons also varies over longer  
605 time courses associated with broader physiological states [126, 127]. This complex  
606 connectivity likely supports the context-dependent effects of the dorsal raphe, for  
607 instance evoking escape behaviors under high threat conditions yet reducing movement  
608 under low threat conditions [128]. Thus, as a population, serotonergic neurons are  
609 diverse in their influence and response properties. The heterogeneity of CSDn  
610 connectivity suggests that this degree of complexity may be conserved even at the level  
611 of single serotonin neurons.

612 Even considering differences within and between neural networks, as well as the  
613 simultaneous integration of local and extrinsic synaptic input, the CSDns are likely more  
614 heterogeneous than their connectivity would suggest. For instance, somatodendritic and  
615 axonal expression of the serotonin re-uptake transporter by the CSDns have different  
616 effects on odor-guided behavior [41], suggesting that compartment-specific protein  
617 localization allows further functional heterogeneity. Furthermore, serotonergic neurons  
618 can also release serotonin in a paracrine manner [129, 130] potentially providing an  
619 additional form of communication. In addition, serotonergic neurons often release other  
620 transmitters, such as acetylcholine in the case of the CSDns [42] and glutamate, GABA,  
621 neuropeptides or nitric oxide in the case of serotonergic raphe neurons [18, 21, 131-  
622 133]. Thus, the synaptic influence of the CSDns likely arises from the influence of  
623 serotonin in combination with other transmitters [42]. Finally, the impact of serotonin

624 depends upon a suite of serotonin receptors, that differ in their modes of action and  
625 binding affinity for serotonin [134, 135]. Within the AL, serotonin receptors are  
626 expressed by different principal neuron subtypes [45], adding further complexity to the  
627 influence of the CSDns. Several brain regions are densely innervated by the CSDns  
628 and each region has its own distinct network architecture. Heterogeneous,  
629 compartment-specific connectivity likely provides the CSDns with the ability to engage  
630 with the local nuances of each network while simultaneously integrating input from  
631 extrinsic sources. Given the known diversity of neurons within modulatory nuclei, it is  
632 likely that complex connectivity of individual modulatory neurons, such as the one  
633 described here, is a conserved feature of modulatory neurons across taxa.

634

## 635 **Methods**

### 636 **Immunocytochemistry**

637 Flies were raised on standard cornmeal/agar/yeast medium at 25°C and 60% humidity  
638 on a 12:12 light/dark cycle. The following fly stocks were used:

- 639 • MultiColor FlpOut (MCFO<sup>-1</sup>) (Bloom. #64085) and R14C11-GAL4 (Bloom.  
640 #49256) (Figure 1A)
- 641 • MB465c-split GAL4 (Bloom. #68371), UAS-Brp-short<sub>mStraw</sub>, UAS-GFP [55, 58]  
642 (Figure 1D)
- 643 • R25C01-GAL4 (Bloom. #49115), MultiColor FlpOut (MCFO<sup>-1</sup>) (Bloom. #64085),  
644 ChAT-LexA (Bloom. #60319), vGlut-LexA (Bloom. #60314), UAS-RFP, LexAop-  
645 GFP (Bloom. #32229) (Figure 6D-G)

646

**Table 1. Antibodies used for Immunocytochemistry**

| <b>Antigen</b>       | <b>Species, manufacturer, catalog #</b> | <b>Dilution</b> | <b>Inc. Time</b> |
|----------------------|-----------------------------------------|-----------------|------------------|
| DsRed                | Rabbit (Clontech Laboratories, #632496) | 1:250           | 48 hr.           |
| GFP                  | Chicken (Abcam, #ab13970)               | 1:1000          | 24. hr           |
| HA-Tag               | Rabbit (CST, #C29F4)                    | 1:300           | 48 hr.           |
| N-Cadherin           | Rat (DSHB, #DN-Ex #8)                   | 1:10            | 48 hr.           |
| RFP                  | Rabbit (Rockland, #600-401-379)         | 1:500           | 24 hr.           |
| AlexaFluor 488 (Rab) | Goat (Invitrogen, #A-11008)             | 1:1000          | 24 hr.           |
| AlexaFluor 488 (Chk) | Donkey (Jackson Immuno, #703-545-155)   | 1:1000          | 24 hr.           |
| AlexaFluor 546 (Rab) | Donkey (Invitrogen, #A-10040)           | 1:1000          | 24 hr.           |
| V5:DyLight-550       | Mouse (BioRad, #MCA1360D550GA)          | 1:500           | 24 hr.           |
| AlexaFluor 647 (Rat) | Donkey (Abcam, #ab150155)               | 1:1000          | 24 hr.           |

647

648 For immunocytochemistry, brains were dissected in *Drosophila* external saline  
649 [136] and fixed in 4% paraformaldehyde for 30 min at 4°C. Brains were then washed in  
650 PBST (PBS with 0.5% Triton X-100), blocked for 1hr in 2% BSA (Jackson

651 ImmunoResearch Laboratories; #001-000-162) in PBST, and incubated in primary  
652 antibodies according to Table 1. Secondary antibodies were then applied for 24 hours.  
653 Brains were then washed, ran through an ascending glycerol series (40%, 60%, and  
654 80%), and mounted in VectaShield (Vector Labs H-1000). Images were acquired using  
655 either a 40x or 60x oil immersion lens on an Olympus FV1000 confocal microscope.  
656 Images were processed in Olympus Fluoview FV10-ASW and ImageJ.

657

## 658 **EM Dataset and Neuron Reconstruction**

659 The whole female adult fly brain (FAFB) Electron Microscopy dataset was  
660 previously generated as described in [25]. The dataset is available for download at  
661 <https://fafb.catmaid.virtualflybrain.org/>, <https://www.temca2data.org>. Neuron  
662 reconstructions were “traced” manually in FAFB using CATMAID  
663 (<http://www.catmaid.org>) as previously described [137, 138]. In brief, reconstructions  
664 were generated by following the confines of a neuron’s cellular membrane and adding  
665 place markers (nodes). For a given neuron, all nodes are connected. Thus, users were  
666 able to reconstruct the morphology of a neuron throughout the brain volume as well as  
667 annotate synapses. A synapse was identified by the presence of 1) t-bars 2) vesicle  
668 cloud, 3) synaptic cleft, and 4) post-synaptic density [25]. It should be noted that gap  
669 junctions cannot be visualized within the EM dataset and bulk release sites are not  
670 readily evident. All reconstructions were verified by a second, experienced tracer [25,  
671 138]. Some neurons were also reconstructed in part using an automated segmentation  
672 version of the FAFB dataset [139]. These auto-traced neuron fragments were  
673 concatenated by expert users in a separate instance of FAFB and then imported and  
674 merged with previously traced fragments in the actively traced FAFB dataset using the  
675 Python tool “FAFBseg” (<https://github.com/flyconnectome/fafbseg-py>) and verified for  
676 accuracy. Finally, the PNs and LH neurons used in this analysis were published  
677 elsewhere [25, 48-50, 123].

678

## 679 **CSDn Reconstruction**

680 The left-hand CSD neuron (i.e. soma in the fly’s left hemisphere) was originally  
681 identified based on the unique omega-shaped projection pattern of its primary process  
682 that spans the protocerebrum. The CSDn’s identity was later confirmed using NBLAST  
683 [51] to query the reconstructed skeleton against a dataset of light microscopy images of  
684 single neurons [52, 140]. The primary process of the CSDn was reconstructed from  
685 soma to ipsilateral protocerebrum to contralateral protocerebrum, to contralateral AL.  
686 Arborizations from the primary process into the lateral horn and antennal lobes were  
687 also reconstructed “to completion” using methods described in [25]. For all CSDn  
688 branches traced, all presynaptic and postsynaptic sites, as well as pre- and post-  
689 synaptic partners were marked. In total, 23,328,903 nm of CSDn cable was  
690 reconstructed with 2,885 presynaptic sites and 4,141 postsynaptic sites marked. It  
691 should be noted that an incomplete reconstruction of the CSDn was previously  
692 published in [44]. It should also be noted that we identified and partially reconstructed

693 the right-hand CSDn (soma in the fly's right hemisphere) (Figure 1 – supplement 1B)  
694 and observed two synapses between the two CSDns.

695

### 696 **Reconstruction of CSDn partners in 9 glomeruli**

697 We chose nine glomeruli to reconstruct all CSDn synaptic partners in the  
698 contralateral AL based on the lifetime sparseness of the glomerulus as well as the  
699 number of pre and post-synaptic sites of the CSDn (Figure 1F; Figure 2 – figure  
700 supplement 1). To reconstruct synaptic partners in specific glomeruli, the completed  
701 reconstruction of the CSDn was filtered in CATMAID so that only CSDn branches and  
702 synapses within a specific glomerulus were visible, using glomerulus volume meshes  
703 generated in [50]. All neurons synapsing upon the CSDn or receiving synaptic input  
704 from the CSDn were then reconstructed in a given glomerulus towards the neuron's  
705 primary neurite (i.e. backbone) and ceased when the reconstruction was sufficient to  
706 identify the neuron as a PN, LN, ORN, or other neuron type based on its soma location  
707 and/or projection pattern. Short neuron fragments that could not be reconstructed to  
708 backbone due to ambiguity of projections were deemed “orphans” and were excluded  
709 from analyses. Reconstructions were reviewed from starting synapse to the backbone  
710 (primary neurite) by a second expert tracer and then queried using NBLAST as needed.

711

### 712 **LN reconstruction and classification**

713 In the process of reconstructing CSDn synaptic partners in the 9 select glomeruli,  
714 we found that the CSDn is synaptically connected with 84 LNs. LNs were reconstructed  
715 to the extent that, at a minimum, allowed them to be morphologically characterized and  
716 synapses with the CSDn were marked. 2 Patchy LNs, 2 dense ABAF, and 1 sparse  
717 ABAF were reconstructed from soma to backbone into the finer processes of each  
718 glomerulus to synapse dense regions.

719 To compare LNs within and across morphological types, KNN analyses were  
720 performed between all of a neuron branch points and their 1<sup>st</sup>, 3<sup>rd</sup>, and 8<sup>th</sup> nearest  
721 branch points. This generated a distribution of the distance between neighboring branch  
722 points for each neuron so that distributions could be compared between neurons.  
723 Similar branch point distributions therefore indicated that individual LNs likely belong to  
724 the same morphological grouping. Neurons that had more branch points were randomly  
725 subsampled so that an equal number of branch points were compared across neurons.  
726 Analyses scripts and related figures were generated in R using analysis packages  
727 within the natverse (<http://natverse.org/>) [141].

728

### 729 **CSDn active zone distribution in the LH**

730 To determine the distribution of active zones in the lateral horn, CSDn active zones  
731 were labeled using Brp-short<sub>mstraw</sub> as described in [40]. Confocal z-stacks of the lateral  
732 horn were acquired and an “intensity distribution analysis” was performed using Matlab  
733 as previously described in [114]. In brief, the Brp puncta intensity was averaged and  
734 normalized across 10x10 bins and plotted as heatmaps.

735  
736  
737  
738  
739  
740  
741  
742  
743  
744  
745  
746  
747  
748  
749  
750  
751  
752  
753  
754  
755  
756  
757  
758  
759  
760  
761  
762  
763  
764  
765  
766  
767  
768  
769  
770  
771  
772  
773  
774  
775  
776

## Neuronal skeleton data analysis

### *Input/Output Index*

The “Input/Output Index” of presynaptic and postsynaptic sites of the CSDn was calculated by generating a list of presynaptic connectors and postsynaptic connectors within a given neuropil or glomerulus volume using PyMaid (<https://github.com/schlegelp/pymaid>). Volumes used were generated in [50]. For each neuropil, the “Input/Output Index” was calculated as (# presynaptic sites / (# presynaptic + # postsynaptic sites)).

### *Other Analyses*

Synapse fractions, connectivity graphs, and connectivity matrices were generated using CATMAID. The volume of each neuropil mesh, branch length per glomerulus and the number of synapses per glomerulus was calculated using PyMaid (<https://github.com/schlegelp/pymaid>) and analyzed using GraphPad Prism.

## Synapse fractions PCA

PCAs of synapse fractions and associated analyses were performed in R using the *ggfortify*, *ggplot*, and *factoextra* libraries (<https://rpkgs.datanovia.com/factoextra/index.html>). K-means clustering was done to determine if points clustered in the PCA, using PC-scores. (<https://www.rdocumentation.org/packages/stats/versions/3.6.2/topics/kmeans>) [142]. To determine the number of clusters for the k-means, the silhouette method [143] was performed using a k-max of 4, as PC1-PC4 explained more of the variance than would be expected if the variance were equally distributed across all 9 PCs as determined by the scree plot. K-means clustering coloring was then applied to the PCA.

To determine if the variability of upstream and downstream partners differed, the Euclidean distance between each downstream point with all other downstream points were measured in a pairwise manner. The Euclidean distance was determined using PC1-PC4 as explained above (Figure 2 – figure supplement 5B”) for the downstream partners of the 9 glomeruli and then the upstream partners of the 9 glomeruli. Statistical differences in downstream versus upstream distances were determined using a Student’s t-test.

## Imaging processing and analysis

Images of the EM dataset, connectivity graphs, and reconstructions were acquired and exported from CATMAID. The rendered skeleton of the CSDn shown in Figure 1C was generated using Blender (<https://www.blender.org/>) and the CATMAID-to-Blender plugin (<https://github.com/schlegelp/CATMAID-to-Blender>). All figures were organized using CorelDrawX9.

777 **Data availability**

778 Neuron reconstructions generated by our group will be uploaded to the open-access  
779 website <https://catmaid-fafb.virtualflybrain.org> upon publication.

780

781 **Acknowledgments**

782 We are greatly indebted to the FAFB tracing community for their helpful insights and  
783 contributions of neuron tracings, Tom Kazimiers and Andrew Champion for CATMAID  
784 development, Peter Li for development of the autosegmented instance of the FAFB  
785 dataset, and Eric Perlman for making the autosegmented dataset available in  
786 CATMAID. In particular, we would like to thank the Cambridge Drosophila  
787 Connectomics group, especially Greg Jefferis, Marta Costa, Philipp Schlegel, Alex  
788 Bates, Ruairi Roberts, Robert Turnbull, Lisa Marin, and Nik Drummond for use of  
789 hundreds of neuron reconstructions, assistance with custom analyses, and facilitating  
790 access to the autosegmented FAFB dataset. We would also like to thank Feng Li, Mert  
791 Erginkaya, Johann Schor, Jeremy Johnson, Shrey Patel, and Nick Sweet for  
792 contributions of neuron tracings or review; Masayoshi Ito for identifying the R25C01-  
793 GAL4 line as expressing the WPN<sub>B</sub>s; Jay Milam for assistance with collecting confocal  
794 scans of the WPN<sub>B</sub> transmitter colocalization; Tessa Cessario for fly care; Tyler  
795 Sizemore for assistance with recombining fly stocks; Quentin Gaudry for providing the  
796 UAS-RFP, LexAop-GFP;vGlut-LexA line, Tim Mosca for providing the UAS-Brp-  
797 short<sub>tmStraw</sub>, UAS-GFP and David Krantz for providing the hsFLP<sub>1</sub>;MCFO-1 line. Finally,  
798 we would like to thank Kevin Daly, Tim Mosca, and Tyler Sizemore for feedback on the  
799 manuscript and Kevin Daly, Gary Marsat, and Keshav Ramachandra for insight on data  
800 analysis. This work was supported by an NIH DC 016293 and a USAFOSR FA9550-17-  
801 1-0117 to AMD, the HHMI Janelia Research Campus Visiting Scientist Program project  
802 to AMD and KEC, and a Wellcome Trust Collaborative Award (203261/Z/16/Z) and NIH  
803 RF1 MH120679 01 award to DDB. The HHMI supported the generation and hosting of  
804 the FAFB dataset.

805



806 **References**

- 807 1. Marder, E., *Neuromodulation of neuronal circuits: back to the future*. Neuron,  
808 2012. **76**(1): p. 1-11.
- 809 2. Nadim, F. and D. Bucher, *Neuromodulation of neurons and synapses*. Curr Opin  
810 Neurobiol, 2014. **29**: p. 48-56.
- 811 3. Morales, M. and E.B. Margolis, *Ventral tegmental area: cellular heterogeneity,*  
812 *connectivity and behaviour*. Nat Rev Neurosci, 2017. **18**(2): p. 73-85.
- 813 4. Okaty, B.W., K.G. Commons, and S.M. Dymecki, *Embracing diversity in the 5-HT*  
814 *neuronal system*. Nat Rev Neurosci, 2019. **20**(7): p. 397-424.
- 815 5. Schwarz, L.A. and L. Luo, *Organization of the locus coeruleus-norepinephrine*  
816 *system*. Curr Biol, 2015. **25**(21): p. R1051-R1056.
- 817 6. Halliday, G.M., et al., *Distribution of monoamine-synthesizing neurons in the*  
818 *human medulla oblongata*. J Comp Neurol, 1988. **273**(3): p. 301-17.
- 819 7. Ishimura, K., et al., *Quantitative analysis of the distribution of serotonin-*  
820 *immunoreactive cell bodies in the mouse brain*. Neurosci Lett, 1988. **91**(3): p.  
821 265-70.
- 822 8. Pollak Dorocic, I., et al., *A whole-brain atlas of inputs to serotonergic neurons of*  
823 *the dorsal and median raphe nuclei*. Neuron, 2014. **83**(3): p. 663-78.
- 824 9. Weissbourd, B., et al., *Presynaptic partners of dorsal raphe serotonergic and*  
825 *GABAergic neurons*. Neuron, 2014. **83**(3): p. 645-62.
- 826 10. Jensen, P., et al., *Redefining the serotonergic system by genetic lineage*. Nat  
827 Neurosci, 2008. **11**(4): p. 417-9.
- 828 11. Ogawa, S.K., et al., *Organization of monosynaptic inputs to the serotonin and*  
829 *dopamine neuromodulatory systems*. Cell Rep, 2014. **8**(4): p. 1105-18.
- 830 12. Okaty, B.W., et al., *Multi-Scale Molecular Deconstruction of the Serotonin*  
831 *Neuron System*. Neuron, 2015. **88**(4): p. 774-91.
- 832 13. Bang, S.J., et al., *Projections and interconnections of genetically defined*  
833 *serotonin neurons in mice*. Eur J Neurosci, 2012. **35**(1): p. 85-96.
- 834 14. O'Hearn, E. and M.E. Molliver, *Organization of raphe-cortical projections in rat: a*  
835 *quantitative retrograde study*. Brain Res Bull, 1984. **13**(6): p. 709-26.
- 836 15. Wylie, C.J., et al., *Distinct transcriptomes define rostral and caudal serotonin*  
837 *neurons*. J Neurosci, 2010. **30**(2): p. 670-84.
- 838 16. Andrade, R. and S. Haj-Dahmane, *Serotonin neuron diversity in the dorsal raphe*.  
839 ACS Chem Neurosci, 2013. **4**(1): p. 22-5.
- 840 17. Commons, K.G., *Two major network domains in the dorsal raphe nucleus*. J  
841 Comp Neurol, 2015. **523**(10): p. 1488-504.
- 842 18. Ren, J., et al., *Anatomically Defined and Functionally Distinct Dorsal Raphe*  
843 *Serotonin Sub-systems*. Cell, 2018. **175**(2): p. 472-487 e20.
- 844 19. Ren, J., et al., *Single-cell transcriptomes and whole-brain projections of serotonin*  
845 *neurons in the mouse dorsal and median raphe nuclei*. Elife, 2019. **8**.
- 846 20. Fernandez, S.P., et al., *Multiscale single-cell analysis reveals unique phenotypes*  
847 *of raphe 5-HT neurons projecting to the forebrain*. Brain Struct Funct, 2016.  
848 **221**(8): p. 4007-4025.
- 849 21. Huang, K.W., et al., *Molecular and anatomical organization of the dorsal raphe*  
850 *nucleus*. Elife, 2019. **8**.

- 851 22. Katz, P.S. and P.D. Quinlan, *The importance of identified neurons in gastropod*  
852 *molluscs to neuroscience*. Curr Opin Neurobiol, 2019. **56**: p. 1-7.
- 853 23. Dacks, A.M., T.A. Christensen, and J.G. Hildebrand, *Phylogeny of a serotonin-*  
854 *immunoreactive neuron in the primary olfactory center of the insect brain*. J  
855 Comp Neurol, 2006. **498**(6): p. 727-46.
- 856 24. Roy, B., et al., *Metamorphosis of an identified serotonergic neuron in the*  
857 *Drosophila olfactory system*. Neural Dev, 2007. **2**: p. 20.
- 858 25. Zheng, Z., et al., *A Complete Electron Microscopy Volume of the Brain of Adult*  
859 *Drosophila melanogaster*. Cell, 2018. **174**(3): p. 730-743 e22.
- 860 26. Groschner, L.N. and G. Miesenbock, *Mechanisms of Sensory Discrimination:*  
861 *Insights from Drosophila Olfaction*. Annu Rev Biophys, 2019. **48**: p. 209-229.
- 862 27. Liang, L. and L. Luo, *The olfactory circuit of the fruit fly Drosophila melanogaster*.  
863 Sci China Life Sci, 2010. **53**(4): p. 472-84.
- 864 28. Wilson, R.I., *Early olfactory processing in Drosophila: mechanisms and*  
865 *principles*. Annu Rev Neurosci, 2013. **36**: p. 217-41.
- 866 29. Grabe, V. and S. Sachse, *Fundamental principles of the olfactory code*.  
867 Biosystems, 2018. **164**: p. 94-101.
- 868 30. Chou, Y.H., et al., *Diversity and wiring variability of olfactory local interneurons in*  
869 *the Drosophila antennal lobe*. Nat Neurosci, 2010. **13**(4): p. 439-49.
- 870 31. Hong, E.J. and R.I. Wilson, *Simultaneous encoding of odors by channels with*  
871 *diverse sensitivity to inhibition*. Neuron, 2015. **85**(3): p. 573-89.
- 872 32. Liu, W.W. and R.I. Wilson, *Glutamate is an inhibitory neurotransmitter in the*  
873 *Drosophila olfactory system*. Proc Natl Acad Sci U S A, 2013. **110**(25): p. 10294-  
874 9.
- 875 33. Nagel, K.I., E.J. Hong, and R.I. Wilson, *Synaptic and circuit mechanisms*  
876 *promoting broadband transmission of olfactory stimulus dynamics*. Nat Neurosci,  
877 2015. **18**(1): p. 56-65.
- 878 34. Olsen, S.R., V. Bhandawat, and R.I. Wilson, *Divisive normalization in olfactory*  
879 *population codes*. Neuron, 2010. **66**(2): p. 287-99.
- 880 35. Olsen, S.R. and R.I. Wilson, *Lateral presynaptic inhibition mediates gain control*  
881 *in an olfactory circuit*. Nature, 2008. **452**(7190): p. 956-60.
- 882 36. Seki, Y., et al., *Physiological and morphological characterization of local*  
883 *interneurons in the Drosophila antennal lobe*. J Neurophysiol, 2010. **104**(2): p.  
884 1007-19.
- 885 37. Yaksi, E. and R.I. Wilson, *Electrical coupling between olfactory glomeruli*.  
886 Neuron, 2010. **67**(6): p. 1034-47.
- 887 38. Ignell, R., et al., *Presynaptic peptidergic modulation of olfactory receptor neurons*  
888 *in Drosophila*. Proc Natl Acad Sci U S A, 2009. **106**(31): p. 13070-5.
- 889 39. Root, C.M., et al., *A presynaptic gain control mechanism fine-tunes olfactory*  
890 *behavior*. Neuron, 2008. **59**(2): p. 311-21.
- 891 40. Coates, K.E., et al., *Identified serotonergic modulatory neurons have*  
892 *heterogeneous synaptic connectivity within the olfactory system of Drosophila*. J  
893 Neurosci, 2017.
- 894 41. Kasture, A.S., et al., *Distinct contribution of axonal and somatodendritic serotonin*  
895 *transporters in drosophila olfaction*. Neuropharmacology, 2019. **161**: p. 107564.

- 896 42. Zhang, X. and Q. Gaudry, *Functional integration of a serotonergic neuron in the*  
897 *Drosophila antennal lobe*. *Elife*, 2016. **5**.
- 898 43. Sun, X.J., L.P. Tolbert, and J.G. Hildebrand, *Ramification pattern and*  
899 *ultrastructural characteristics of the serotonin-immunoreactive neuron in the*  
900 *antennal lobe of the moth Manduca sexta: a laser scanning confocal and electron*  
901 *microscopic study*. *J Comp Neurol*, 1993. **338**(1): p. 5-16.
- 902 44. Zhang, X., et al., *Local synaptic inputs support opposing, network-specific odor*  
903 *representations in a widely projecting modulatory neuron*. *Elife*, 2019. **8**.
- 904 45. Sizemore, T.R. and A.M. Dacks, *Serotonergic Modulation Differentially Targets*  
905 *Distinct Network Elements within the Antennal Lobe of Drosophila melanogaster*.  
906 *Sci Rep*, 2016. **6**: p. 37119.
- 907 46. Xu, L., et al., *A Single Pair of Serotonergic Neurons Counteracts Serotonergic*  
908 *Inhibition of Ethanol Attraction in Drosophila*. *PLoS One*, 2016. **11**(12): p.  
909 e0167518.
- 910 47. Singh, A.P., et al., *Sensory neuron-derived eph regulates glomerular arbors and*  
911 *modulatory function of a central serotonergic neuron*. *PLoS Genet*, 2013. **9**(4): p.  
912 e1003452.
- 913 48. Dolan, M.J., et al., *Neurogenetic dissection of the Drosophila lateral horn reveals*  
914 *major outputs, diverse behavioural functions, and interactions with the mushroom*  
915 *body*. *Elife*, 2019. **8**.
- 916 49. Frechter, S., et al., *Functional and anatomical specificity in a higher olfactory*  
917 *centre*. *Elife*, 2019. **8**.
- 918 50. Bates, A.S., et al., *Complete connectomic reconstruction of olfactory projection*  
919 *neurons in the fly brain*. *BioRxiv*, 2020.
- 920 51. Costa, M., et al., *NBLAST: Rapid, Sensitive Comparison of Neuronal Structure*  
921 *and Construction of Neuron Family Databases*. *Neuron*, 2016. **91**(2): p. 293-311.
- 922 52. Chiang, A.S., et al., *Three-dimensional reconstruction of brain-wide wiring*  
923 *networks in Drosophila at single-cell resolution*. *Curr Biol*, 2011. **21**(1): p. 1-11.
- 924 53. Jeanne, J.M., M. Fisek, and R.I. Wilson, *The Organization of Projections from*  
925 *Olfactory Glomeruli onto Higher-Order Neurons*. *Neuron*, 2018. **98**(6): p. 1198-  
926 1213 e6.
- 927 54. Jeanne, J.M. and R.I. Wilson, *Convergence, Divergence, and Reconvergence in*  
928 *a Feedforward Network Improves Neural Speed and Accuracy*. *Neuron*, 2015.  
929 **88**(5): p. 1014-1026.
- 930 55. Fouquet, W., et al., *Maturation of active zone assembly by Drosophila Bruchpilot*.  
931 *J Cell Biol*, 2009. **186**(1): p. 129-45.
- 932 56. Oswald, D., et al., *A Syd-1 homologue regulates pre- and postsynaptic maturation*  
933 *in Drosophila*. *J Cell Biol*, 2010. **188**(4): p. 565-79.
- 934 57. Schmid, A., et al., *Activity-dependent site-specific changes of glutamate receptor*  
935 *composition in vivo*. *Nat Neurosci*, 2008. **11**(6): p. 659-66.
- 936 58. Mosca, T.J. and L. Luo, *Synaptic organization of the Drosophila antennal lobe*  
937 *and its regulation by the Teneurins*. *Elife*, 2014. **3**: p. e03726.
- 938 59. Grabe, V., et al., *Elucidating the Neuronal Architecture of Olfactory Glomeruli in*  
939 *the Drosophila Antennal Lobe*. *Cell Rep*, 2016. **16**(12): p. 3401-3413.
- 940 60. Carlsson, M.A., et al., *Multiple neuropeptides in the Drosophila antennal lobe*  
941 *suggest complex modulatory circuits*. *J Comp Neurol*, 2010. **518**(16): p. 3359-80.

- 942 61. Das, A., et al., *Identification and analysis of a glutamatergic local interneuron*  
943 *lineage in the adult Drosophila olfactory system*. Neural Syst Circuits, 2011. **1**(1):  
944 p. 4.
- 945 62. Wilson, R.I. and G. Laurent, *Role of GABAergic inhibition in shaping odor-evoked*  
946 *spatiotemporal patterns in the Drosophila antennal lobe*. J Neurosci, 2005.  
947 **25**(40): p. 9069-79.
- 948 63. Berck, M.E., et al., *The wiring diagram of a glomerular olfactory system*. Elife,  
949 2016. **5**.
- 950 64. Otopalik, A.G., et al., *Sloppy morphological tuning in identified neurons of the*  
951 *crustacean stomatogastric ganglion*. Elife, 2017. **6**.
- 952 65. Otopalik, A.G., et al., *When complex neuronal structures may not matter*. Elife,  
953 2017. **6**.
- 954 66. Tobin, W.F., R.I. Wilson, and W.A. Lee, *Wiring variations that enable and*  
955 *constrain neural computation in a sensory microcircuit*. Elife, 2017. **6**.
- 956 67. Marin, E.C., et al., *Connectomics analysis reveals first, second, and third order*  
957 *thermosensory and hygrosensory neurons in the adult Drosophila brain*. BioRxiv,  
958 2020.
- 959 68. Liang, L., et al., *GABAergic projection neurons route selective olfactory inputs to*  
960 *specific higher-order neurons*. Neuron, 2013. **79**(5): p. 917-31.
- 961 69. Parnas, M., et al., *Odor discrimination in Drosophila: from neural population*  
962 *codes to behavior*. Neuron, 2013. **79**(5): p. 932-44.
- 963 70. Strutz, A., et al., *Decoding odor quality and intensity in the Drosophila brain*.  
964 Elife, 2014. **3**: p. e04147.
- 965 71. Caron, S.J., et al., *Random convergence of olfactory inputs in the Drosophila*  
966 *mushroom body*. Nature, 2013. **497**(7447): p. 113-7.
- 967 72. Suver, M.P., et al., *Encoding of Wind Direction by Central Neurons in Drosophila*.  
968 Neuron, 2019. **102**(4): p. 828-842 e7.
- 969 73. Ito, M., et al., *Systematic analysis of neural projections reveals clonal*  
970 *composition of the Drosophila brain*. Curr Biol, 2013. **23**(8): p. 644-55.
- 971 74. Kamikouchi, A., et al., *The neural basis of Drosophila gravity-sensing and*  
972 *hearing*. Nature, 2009. **458**(7235): p. 165-71.
- 973 75. Lai, J.S., et al., *Auditory circuit in the Drosophila brain*. Proc Natl Acad Sci U S A,  
974 2012. **109**(7): p. 2607-12.
- 975 76. Matsuo, E., et al., *Organization of projection neurons and local neurons of the*  
976 *primary auditory center in the fruit fly Drosophila melanogaster*. J Comp Neurol,  
977 2016. **524**(6): p. 1099-164.
- 978 77. Patella, P. and R.I. Wilson, *Functional Maps of Mechanosensory Features in the*  
979 *Drosophila Brain*. Curr Biol, 2018. **28**(8): p. 1189-1203 e5.
- 980 78. Vaughan, A.G., et al., *Neural pathways for the detection and discrimination of*  
981 *conspecific song in D. melanogaster*. Curr Biol, 2014. **24**(10): p. 1039-49.
- 982 79. Nern, A., B.D. Pfeiffer, and G.M. Rubin, *Optimized tools for multicolor stochastic*  
983 *labeling reveal diverse stereotyped cell arrangements in the fly visual system*.  
984 Proc Natl Acad Sci U S A, 2015. **112**(22): p. E2967-76.
- 985 80. Diao, F., et al., *Plug-and-play genetic access to drosophila cell types using*  
986 *exchangeable exon cassettes*. Cell Rep, 2015. **10**(8): p. 1410-21.

- 987 81. Xu, C.S., et al., *A Connectome of the Adult Drosophila Central Brain*. BioRxiv,  
988 2020.
- 989 82. Bates, A.S., et al., *Neuronal cell types in the fly: single-cell anatomy meets*  
990 *single-cell genomics*. *Curr Opin Neurobiol*, 2019. **56**: p. 125-134.
- 991 83. Schlegel, P., M. Costa, and G.S. Jefferis, *Learning from connectomics on the fly*.  
992 *Curr Opin Insect Sci*, 2017. **24**: p. 96-105.
- 993 84. Cook, S.J., et al., *Whole-animal connectomes of both Caenorhabditis elegans*  
994 *sexes*. *Nature*, 2019. **571**(7763): p. 63-71.
- 995 85. Meinertzhagen, I.A., *Of what use is connectomics? A personal perspective on*  
996 *the Drosophila connectome*. *J Exp Biol*, 2018. **221**(Pt 10).
- 997 86. Ohyama, T., et al., *A multilevel multimodal circuit enhances action selection in*  
998 *Drosophila*. *Nature*, 2015. **520**(7549): p. 633-9.
- 999 87. Beier, K.T., et al., *Circuit Architecture of VTA Dopamine Neurons Revealed by*  
1000 *Systematic Input-Output Mapping*. *Cell*, 2015. **162**(3): p. 622-34.
- 1001 88. Schwarz, L.A., et al., *Viral-genetic tracing of the input-output organization of a*  
1002 *central noradrenaline circuit*. *Nature*, 2015. **524**(7563): p. 88-92.
- 1003 89. Dacks, A.M., T.A. Christensen, and J.G. Hildebrand, *Modulation of olfactory*  
1004 *information processing in the antennal lobe of Manduca sexta by serotonin*. *J*  
1005 *Neurophysiol*, 2008. **99**(5): p. 2077-85.
- 1006 90. Dacks, A.M., et al., *Serotonin modulates olfactory processing in the antennal*  
1007 *lobe of Drosophila*. *J Neurogenet*, 2009. **23**(4): p. 366-77.
- 1008 91. Hardy, A., et al., *5-Hydroxytryptamine action in the rat olfactory bulb: in vitro*  
1009 *electrophysiological patch-clamp recordings of juxtglomerular and mitral cells*.  
1010 *Neuroscience*, 2005. **131**(3): p. 717-31.
- 1011 92. Kloppenburg, P., B.S. Kirchhof, and A.R. Mercer, *Voltage-activated currents from*  
1012 *adult honeybee (Apis mellifera) antennal motor neurons recorded in vitro and in*  
1013 *situ*. *J Neurophysiol*, 1999. **81**(1): p. 39-48.
- 1014 93. Mercer, A.R., J.H. Hayashi, and J.G. Hildebrand, *Modulatory effects of 5-*  
1015 *hydroxytryptamine on voltage-activated currents in cultured antennal lobe*  
1016 *neurones of the sphinx moth Manduca sexta*. *J Exp Biol*, 1995. **198**(Pt 3): p. 613-  
1017 27.
- 1018 94. Mercer, A.R., B.S. Kirchhof, and J.G. Hildebrand, *Enhancement by serotonin of*  
1019 *the growth in vitro of antennal lobe neurons of the sphinx moth Manduca sexta*. *J*  
1020 *Neurobiol*, 1996. **29**(1): p. 49-64.
- 1021 95. Appel, N.M., et al., *Autoradiographic characterization of (+-)-1-(2,5-dimethoxy-4-*  
1022 *[125I] iodophenyl)-2-aminopropane ([125I]DOI) binding to 5-HT<sub>2</sub> and 5-HT<sub>1c</sub>*  
1023 *receptors in rat brain*. *J Pharmacol Exp Ther*, 1990. **255**(2): p. 843-57.
- 1024 96. Hellendall, R.P., et al., *Prenatal expression of 5-HT<sub>1C</sub> and 5-HT<sub>2</sub> receptors in*  
1025 *the rat central nervous system*. *Exp Neurol*, 1993. **120**(2): p. 186-201.
- 1026 97. McLean, J.H., A. Darby-King, and G.D. Paterno, *Localization of 5-HT<sub>2A</sub> receptor*  
1027 *mRNA by in situ hybridization in the olfactory bulb of the postnatal rat*. *J Comp*  
1028 *Neurol*, 1995. **353**(3): p. 371-8.
- 1029 98. Shen, Y., et al., *Molecular cloning and expression of a 5-hydroxytryptamine<sub>7</sub>*  
1030 *serotonin receptor subtype*. *J Biol Chem*, 1993. **268**(24): p. 18200-4.

- 1031 99. Tecott, L.H., A.V. Maricq, and D. Julius, *Nervous system distribution of the*  
1032 *serotonin 5-HT<sub>3</sub> receptor mRNA*. Proc Natl Acad Sci U S A, 1993. **90**(4): p.  
1033 1430-4.
- 1034 100. Waeber, C., et al., *Putative 5-HT<sub>5</sub> receptors: localization in the mouse CNS and*  
1035 *lack of effect in the inhibition of dural protein extravasation*. Ann N Y Acad Sci,  
1036 1998. **861**: p. 85-90.
- 1037 101. Watts, S.W., et al., *Autoradiographic comparison of [125I]LSD-labeled 5-HT<sub>2A</sub>*  
1038 *receptor distribution in rat and guinea pig brain*. Neurochem Int, 1994. **24**(6): p.  
1039 565-74.
- 1040 102. Brill, J., et al., *Serotonin increases synaptic activity in olfactory bulb glomeruli*. J  
1041 Neurophysiol, 2015: p. jn 00847 2015.
- 1042 103. Kapoor, V., et al., *Activation of raphe nuclei triggers rapid and distinct effects on*  
1043 *parallel olfactory bulb output channels*. Nat Neurosci, 2016.
- 1044 104. Liu, S., et al., *Serotonin modulates the population activity profile of olfactory bulb*  
1045 *external tufted cells*. J Neurophysiol, 2012. **107**(1): p. 473-83.
- 1046 105. Huang, Z., N. Thiebaud, and D.A. Fadool, *Differential serotonergic modulation*  
1047 *across the main and accessory olfactory bulbs*. J Physiol, 2017. **595**(11): p.  
1048 3515-3533.
- 1049 106. Lottem, E., M.L. Lorincz, and Z.F. Mainen, *Optogenetic Activation of Dorsal*  
1050 *Raphe Serotonin Neurons Rapidly Inhibits Spontaneous But Not Odor-Evoked*  
1051 *Activity in Olfactory Cortex*. J Neurosci, 2016. **36**(1): p. 7-18.
- 1052 107. Kaas, J.H., *Topographic maps are fundamental to sensory processing*. Brain Res  
1053 Bull, 1997. **44**(2): p. 107-12.
- 1054 108. Kaneko, T. and B. Ye, *Fine-scale topography in sensory systems: insights from*  
1055 *Drosophila and vertebrates*. J Comp Physiol A Neuroethol Sens Neural Behav  
1056 Physiol, 2015. **201**(9): p. 911-20.
- 1057 109. Patel, G.H., D.M. Kaplan, and L.H. Snyder, *Topographic organization in the*  
1058 *brain: searching for general principles*. Trends Cogn Sci, 2014. **18**(7): p. 351-63.
- 1059 110. Rothschild, G. and A. Mizrahi, *Global order and local disorder in brain maps*.  
1060 Annu Rev Neurosci, 2015. **38**: p. 247-68.
- 1061 111. Gomez, C., et al., *Heterogeneous targeting of centrifugal inputs to the glomerular*  
1062 *layer of the main olfactory bulb*. J Chem Neuroanat, 2005. **29**(4): p. 238-54.
- 1063 112. Gracia-Llanes, F.J., et al., *Synaptic connectivity of serotonergic axons in the*  
1064 *olfactory glomeruli of the rat olfactory bulb*. Neuroscience, 2010. **169**(2): p. 770-  
1065 80.
- 1066 113. Muzerelle, A., et al., *Conditional anterograde tracing reveals distinct targeting of*  
1067 *individual serotonin cell groups (B5-B9) to the forebrain and brainstem*. Brain  
1068 Struct Funct, 2016. **221**(1): p. 535-61.
- 1069 114. Lizbinski, K.M., et al., *The anatomical basis for modulatory convergence in the*  
1070 *antennal lobe of Manduca sexta*. J Comp Neurol, 2016. **524**(9): p. 1859-75.
- 1071 115. Shang, Y., et al., *Excitatory local circuits and their implications for olfactory*  
1072 *processing in the fly antennal lobe*. Cell, 2007. **128**(3): p. 601-12.
- 1073 116. Katz, P.S. and W.N. Frost, *Intrinsic neuromodulation: altering neuronal circuits*  
1074 *from within*. Trends Neurosci, 1996. **19**(2): p. 54-61.
- 1075 117. Lizbinski, K.M. and A.M. Dacks, *Intrinsic and Extrinsic Neuromodulation of*  
1076 *Olfactory Processing*. Front Cell Neurosci, 2018. **11**: p. 424.

- 1077 118. Dweck, H.K., et al., *Olfactory preference for egg laying on citrus substrates in*  
1078 *Drosophila*. *Curr Biol*, 2013. **23**(24): p. 2472-80.
- 1079 119. Prieto-Godino, L.L., et al., *Evolution of Acid-Sensing Olfactory Circuits in*  
1080 *Drosophilids*. *Neuron*, 2017. **93**(3): p. 661-676 e6.
- 1081 120. Semmelhack, J.L. and J.W. Wang, *Select Drosophila glomeruli mediate innate*  
1082 *olfactory attraction and aversion*. *Nature*, 2009. **459**(7244): p. 218-23.
- 1083 121. Knaden, M., et al., *Spatial representation of odorant valence in an insect brain*.  
1084 *Cell Rep*, 2012. **1**(4): p. 392-9.
- 1085 122. Fuyama, Y., *Behavior genetics of olfactory responses in Drosophila. I.*  
1086 *Olfactometry and strain differences in Drosophila melanogaster*. *Behav Genet*,  
1087 1976. **6**(4): p. 407-20.
- 1088 123. Huovalia, P., et al., *Neural circuit basis of aversive odour processing in*  
1089 *Drosophila from sensory input to descending output*. *BioRxiv*, 2019.
- 1090 124. Silbering, A.F., et al., *Complementary function and integrated wiring of the*  
1091 *evolutionarily distinct Drosophila olfactory subsystems*. *J Neurosci*, 2011. **31**(38):  
1092 p. 13357-75.
- 1093 125. Cohen, J.Y., M.W. Amoroso, and N. Uchida, *Serotonergic neurons signal reward*  
1094 *and punishment on multiple timescales*. *Elife*, 2015. **4**.
- 1095 126. Jacobs, B.L., J. Heym, and M.E. Trulson, *Behavioral and physiological correlates*  
1096 *of brain serotonergic unit activity*. *J Physiol (Paris)*, 1981. **77**(2-3): p. 431-6.
- 1097 127. Monti, J.M., *Serotonin control of sleep-wake behavior*. *Sleep Med Rev*, 2011.  
1098 **15**(4): p. 269-81.
- 1099 128. Seo, C., et al., *Intense threat switches dorsal raphe serotonin neurons to a*  
1100 *paradoxical operational mode*. *Science*, 2019. **363**(6426): p. 538-542.
- 1101 129. Bunin, M.A. and R.M. Wightman, *Quantitative evaluation of 5-hydroxytryptamine*  
1102 *(serotonin) neuronal release and uptake: an investigation of extrasynaptic*  
1103 *transmission*. *J Neurosci*, 1998. **18**(13): p. 4854-60.
- 1104 130. Bunin, M.A. and R.M. Wightman, *Paracrine neurotransmission in the CNS:*  
1105 *involvement of 5-HT*. *Trends Neurosci*, 1999. **22**(9): p. 377-82.
- 1106 131. Fu, W., et al., *Chemical neuroanatomy of the dorsal raphe nucleus and adjacent*  
1107 *structures of the mouse brain*. *J Comp Neurol*, 2010. **518**(17): p. 3464-94.
- 1108 132. Liu, Z., et al., *Dorsal raphe neurons signal reward through 5-HT and glutamate*.  
1109 *Neuron*, 2014. **81**(6): p. 1360-74.
- 1110 133. Sengupta, A., et al., *Control of Amygdala Circuits by 5-HT Neurons via 5-HT and*  
1111 *Glutamate Cotransmission*. *J Neurosci*, 2017. **37**(7): p. 1785-1796.
- 1112 134. Gasque, G., et al., *Small molecule drug screening in Drosophila identifies the*  
1113 *5HT2A receptor as a feeding modulation target*. *Sci Rep*, 2013. **3**: p. srep02120.
- 1114 135. Nichols, D.E. and C.D. Nichols, *Serotonin receptors*. *Chem Rev*, 2008. **108**(5): p.  
1115 1614-41.
- 1116 136. Zhang, B., M.R. Freeman, and S. Waddell, *Drosophila neurobiology : a*  
1117 *laboratory manual*. 2010, Cold Spring Harbor, N.Y.: Cold Spring Harbor  
1118 Laboratory Press. x, 534 p.
- 1119 137. Saalfeld, S., et al., *CATMAID: collaborative annotation toolkit for massive*  
1120 *amounts of image data*. *Bioinformatics*, 2009. **25**(15): p. 1984-6.
- 1121 138. Schneider-Mizell, C.M., et al., *Quantitative neuroanatomy for connectomics in*  
1122 *Drosophila*. *Elife*, 2016. **5**.

- 1123 139. Li, P.H., et al., *Automated Reconstruction of a Serial-Section EM Drosophila*  
1124 *Brain with Flood-Filling Networks and Local Realignment*. BioRxiv, 2019.
- 1125 140. Milyaev, N., et al., *The Virtual Fly Brain browser and query interface*.  
1126 *Bioinformatics*, 2012. **28**(3): p. 411-5.
- 1127 141. Bates, A.S., et al., *The natverse: a versatile computational toolbox to combine*  
1128 *and analyse neuroanatomical data*. BioRxiv, 2019.
- 1129 142. MacQueen, B., *Some methods for classification and analysis of multivariate*  
1130 *observations*. Proceedings of 5-th Berkeley Symposium on Mathematical  
1131 *Statistics and Probability*, 1967. **1**: p. 281-297.
- 1132 143. Rousseeuw, P., *Silhouettes: a Graphical Aid to the Interpretation and Validation*  
1133 *of Cluster Analysis*. *Computational and Applied Mathematics.*, 1987. **20**: p. 53-  
1134 65.
- 1135
- 1136



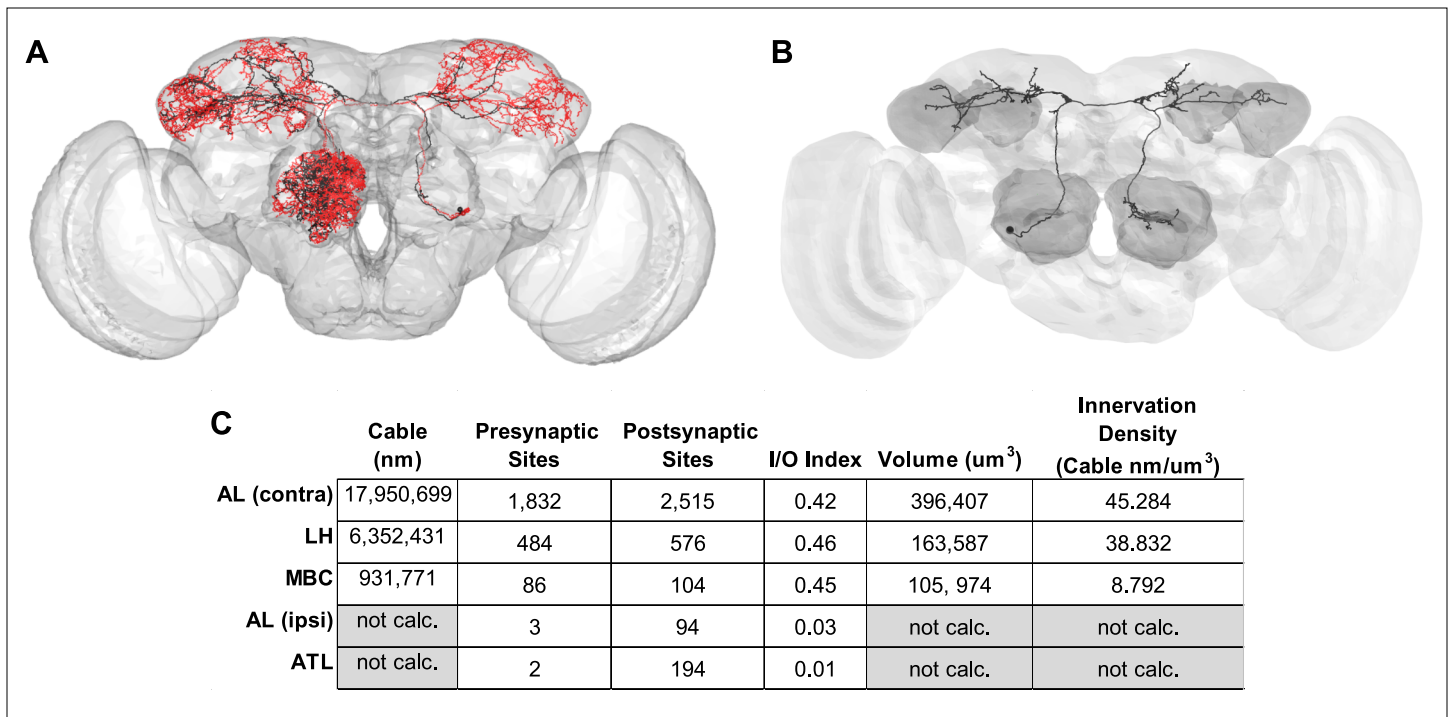

**Figure 1 - figure supplement 1: NBLAST and stats of the left-hand CSDn and EM reconstruction of the right-hand CSDn.** (A) Overlay of the (left-hand) CSDn reconstruction (black) with skeletonized CSDn from light microscopy image dataset via NBLAST (red). Similarity score = 0.716 (where 1 equals perfect alignment with dataset). (B) Partial Reconstruction of the right-hand CSDn. (C) Broad stats of the CSDn across neuropil, including metrics used to make the “heat maps” in Figure 1C.

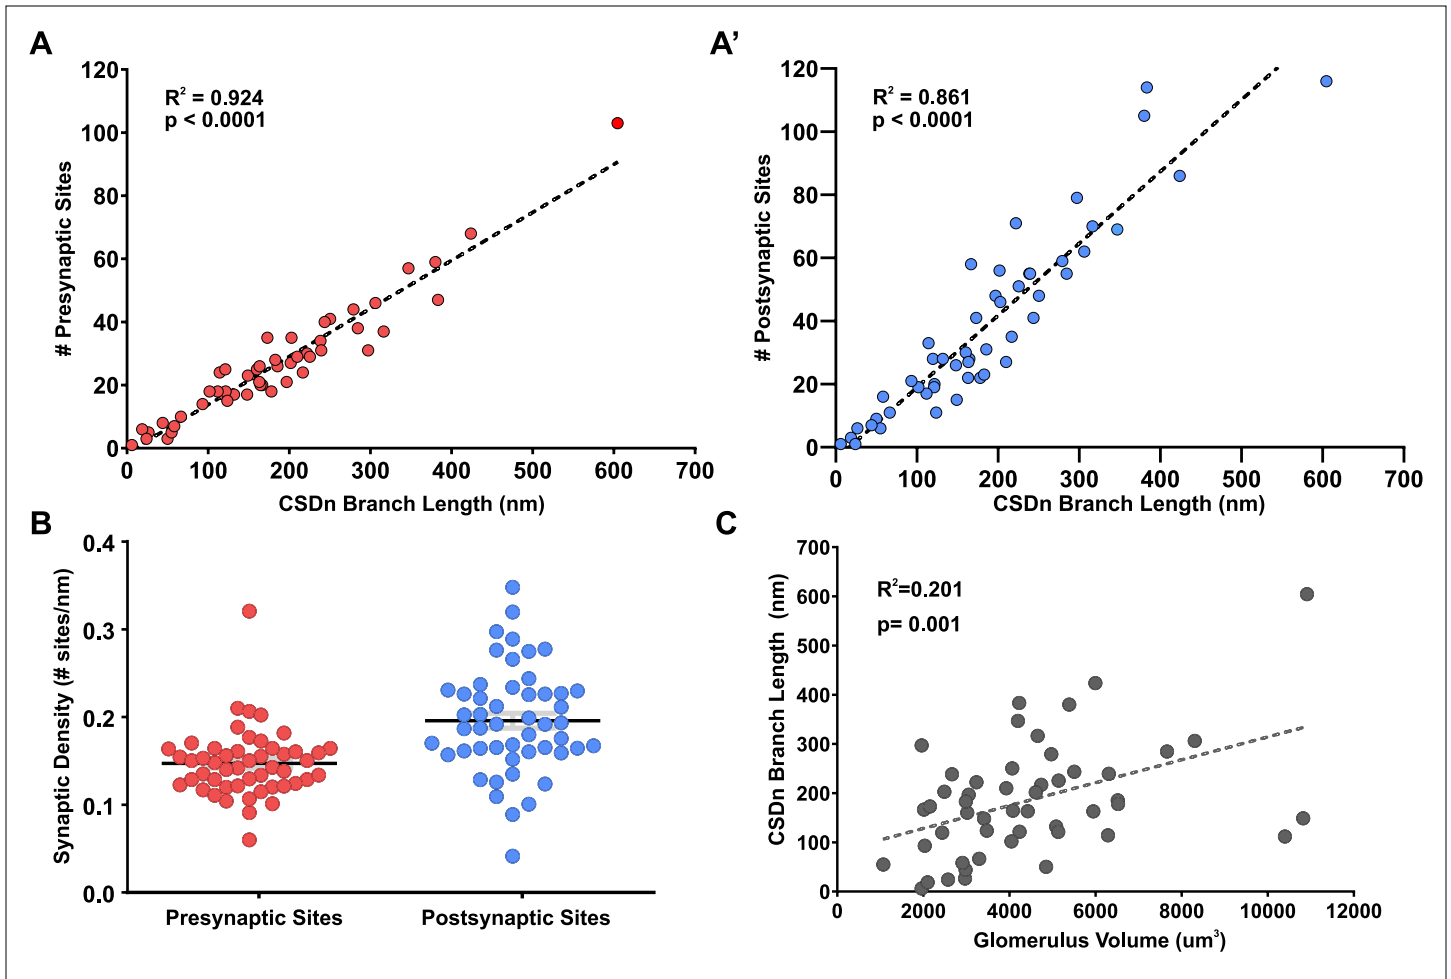

**Figure 1 - figure supplement 2: CSDn AL stats.** CSDn branch length in glomeruli is highly correlated to (A) CSDn presynaptic sites ( $R^2=0.924$ ,  $p < 0.0001$ ) and (A') number of CSDn postsynaptic sites ( $R^2=0.861$ ,  $p < 0.0001$ ). (B) CSDn presynaptic density (red) (# sites/nm branch length) and postsynaptic density (blue) are fairly consistent across glomeruli (COV = 26.26% and 30.85%, respectively), although postsynaptic is more distributed ( $p < 0.005$ , Levene's test for homogeneity of variance). (C) CSDn branch length per glomerulus weakly correlates to glomerular volume ( $R^2=0.201$ ,  $p = 0.001$ ).

| Glomerulus | OR/IR       | Lifetime Sparseness | # Pre-synaptic Sites | # Post-synaptic Sites | CSDn Branch Length (nm) | Volume ( $\mu\text{m}^3$ ) |
|------------|-------------|---------------------|----------------------|-----------------------|-------------------------|----------------------------|
| DA1        | Or67d       | 0.98                | 23                   | 15                    | 149.00                  | 10823.66                   |
| DA2        | Or56a/Or33a | 0.99                | 34                   | 55                    | 238.36                  | 2663.53                    |
| DC1        | Or19a/b     | 0.70                | 59                   | 105                   | 380.05                  | 5389.84                    |
| DM1        | Or42b       | 0.57                | 24                   | 33                    | 114.22                  | 6289.18                    |
| DM5        | Or85a/Or33b | 0.85                | 31                   | 79                    | 297.16                  | 1962.05                    |
| VC2        | Or71a       | 0.88                | 7                    | 16                    | 58.21                   | 2907.05                    |
| VM1        | Ir92a       | n/a                 | 27                   | 56                    | 201.79                  | 4610.24                    |
| VM2        | Or43b       | 0.65                | 14                   | 21                    | 93.08                   | 2033.40                    |
| VM3        | Or9a        | 0.56                | 28                   | 23                    | 182.85                  | 2985.84                    |

**Figure 2 - Figure Supplement 1: Data for glomeruli in which CSDn synaptic partners were reconstructed.** Glomeruli were chosen for reconstruction based on the glomerulus's lifetime sparseness, number of pre and postsynaptic sites, CSDn branch length and glomerulus volume to get an array of different combinations of features.

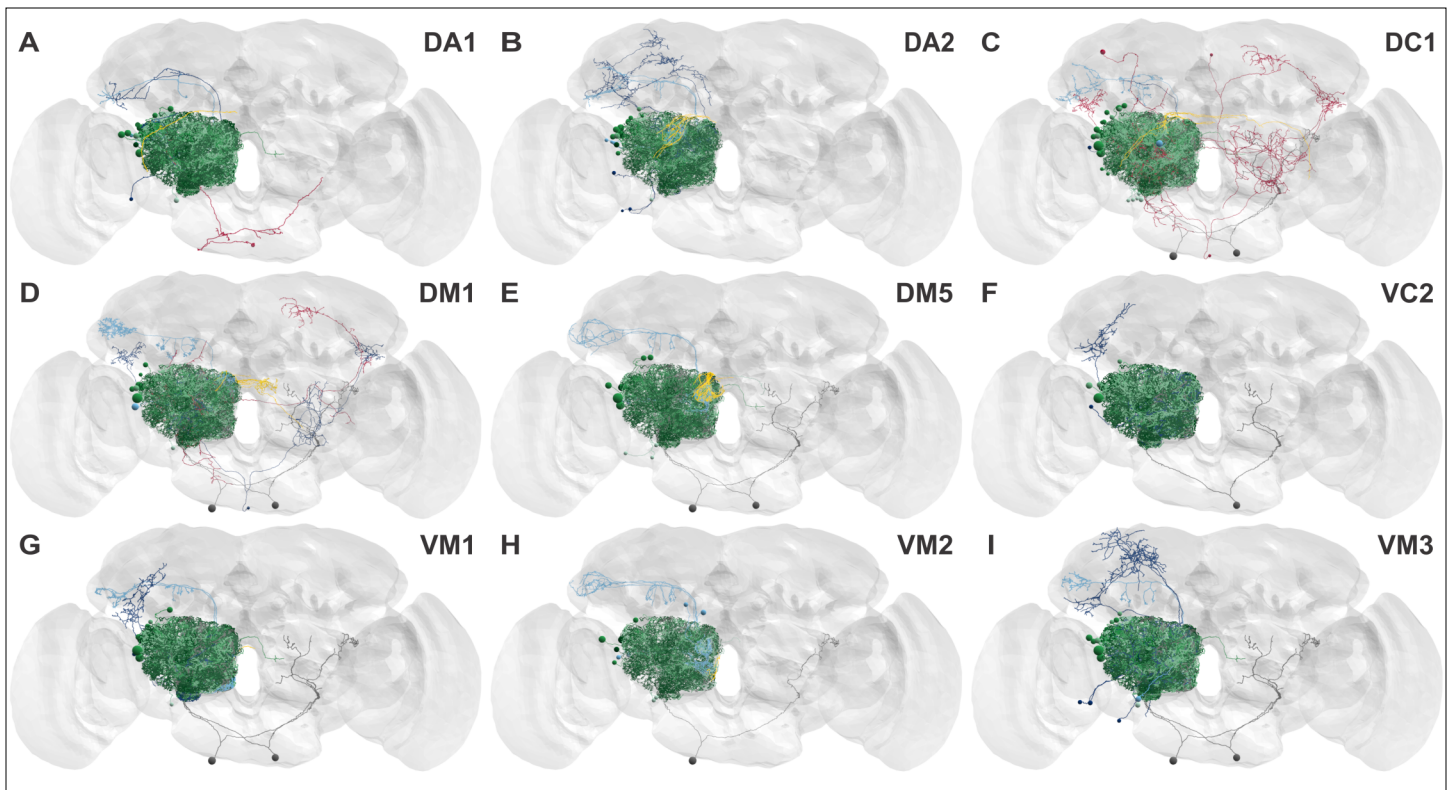

**Figure 2 - figure supplement 2: Downstream synaptic partners of the CSDn in 9 glomeruli within the AL.** EM reconstructions of all neurons that receive input from the CSDn across the 9 glomeruli in the AL: DA1 (A), DA2 (B), DC1 (C), DM1 (D), DM5 (E), VC2 (F), VM1 (G), VM2 (H), and VM3 (I). Neurons were grouped as ORNs (yellow), LNs (green shades), PNs (blue shades), and extrinsic neurons (red).

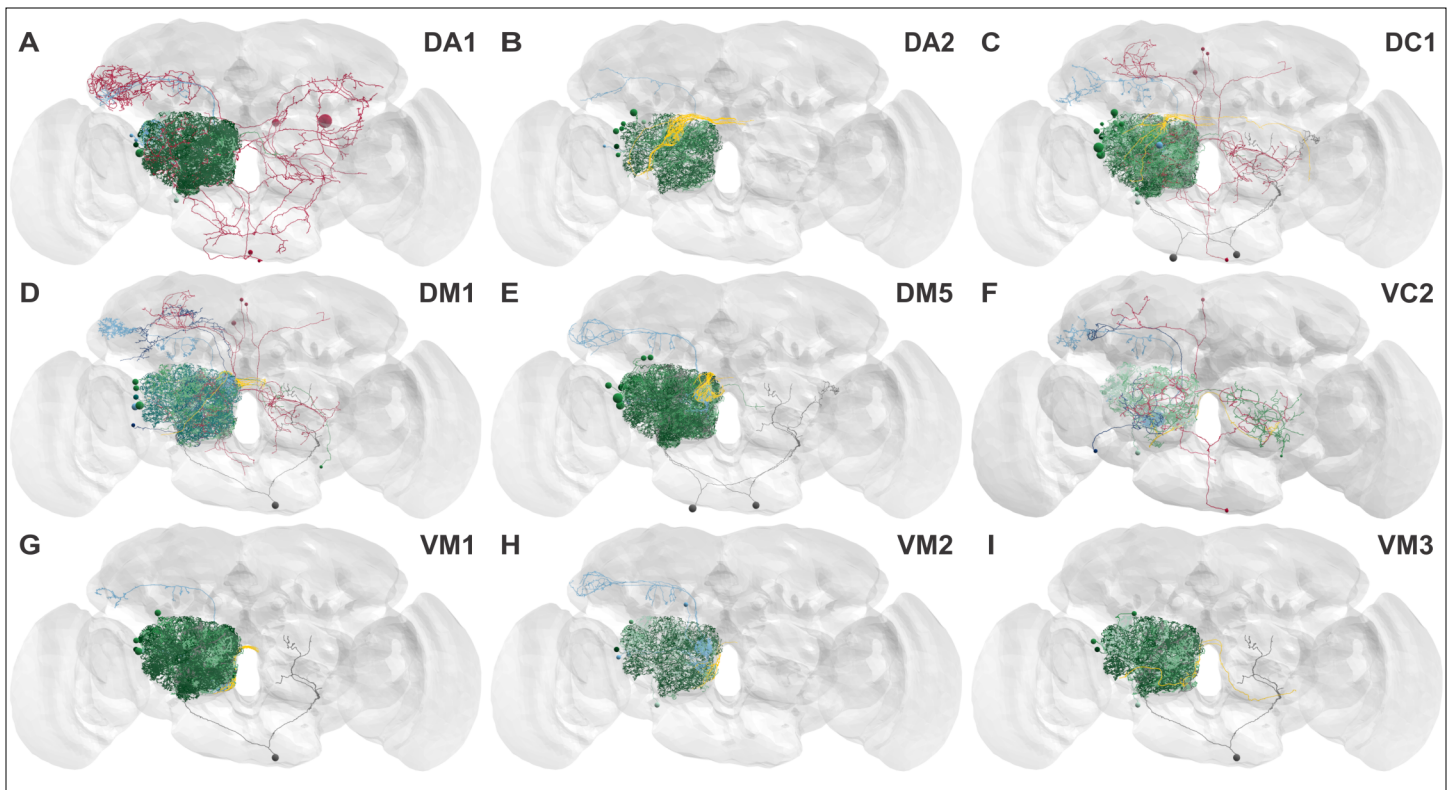

**Figure 2 - figure supplement 3: Upstream synaptic partners of the CSDn in 9 glomeruli within the AL.** EM reconstructions of all neurons that provide input to the CSDn across the 9 glomeruli in the AL: DA1 (A), DA2 (B), DC1 (C), DM1 (D), DM5 (E), VC2 (F), VM1 (G), VM2 (H), and VM3 (I). Neurons were grouped as ORNs (yellow), LNs (green shades), PNs (blue shades), and extrinsic neurons (red).

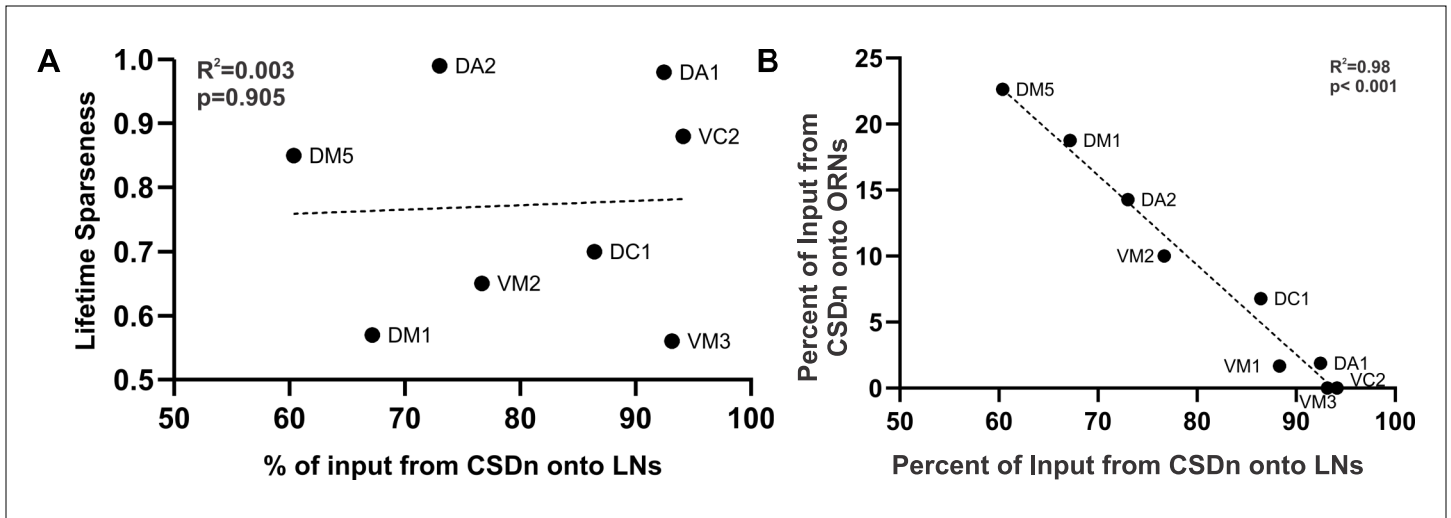

**Figure 2 - figure supplement 4: CSDn connectivity relationships across glomeruli.** (A) Percent of input from the CSDn onto LNs does not correlated with lifetime sparseness of a glomerulus ( $R^2=0.003$ ). VM1's lifetime sparseness value is unknown, thus is excluded. (B) Fraction of input from the CSDn onto LNs is inversely correlated to the percent of input from the CSDn onto ORNs.

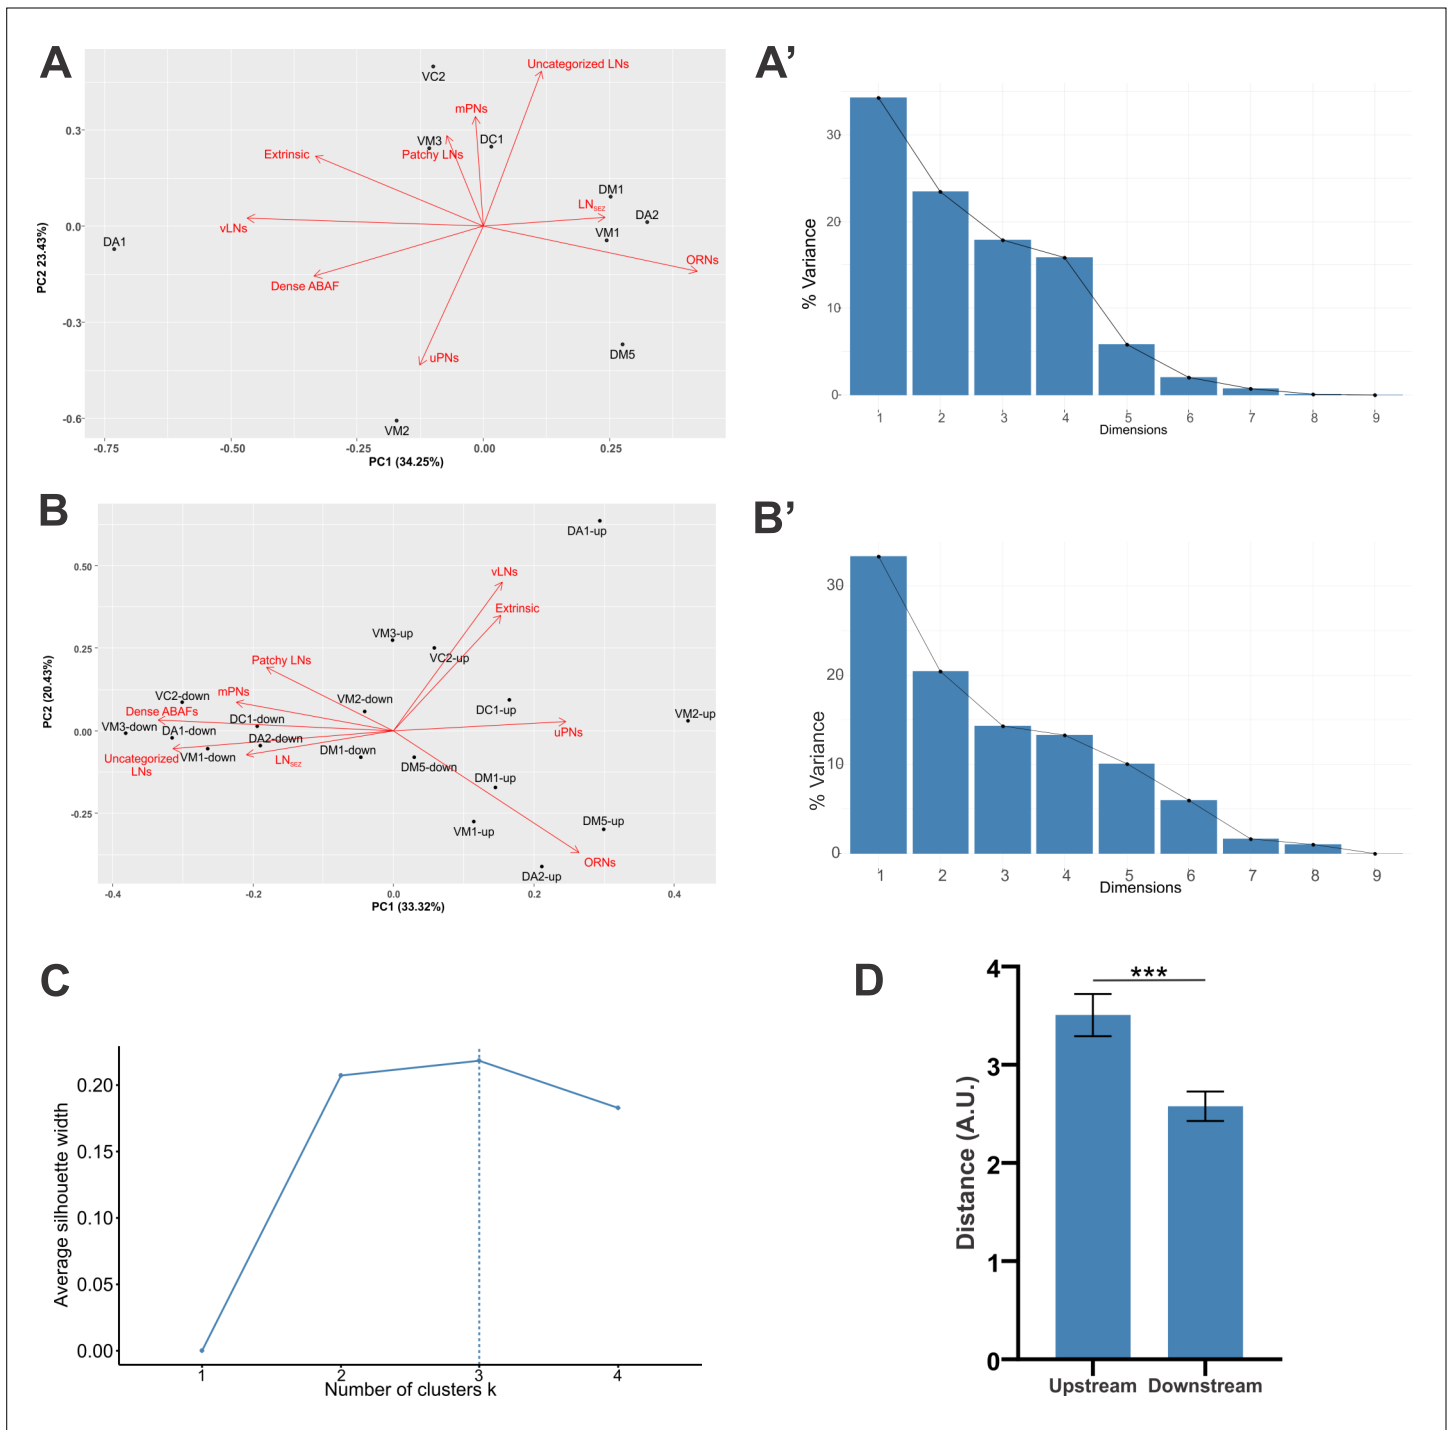

**Figure 2 - figure supplement 5: PCA** (A) PCA of upstream synapse fractions shows that glomeruli do not cluster in PC space based on eigenvectors. (A') Variance is explained by the first 4 principal components. (B) PCA of up and downstream synaptic partners from Figure 2C with eigenvectors shown. (B') Scree plot used to determine which principal components explain the most variance. (C) Silhouette method used to determine the optimal number of clusters for K-means clustering in Figure 2C. (D) The mean distance between downstream points in the PCA (B') is significantly different from the mean distance between upstream points ( $p=0.0007$ , Student's t-test).

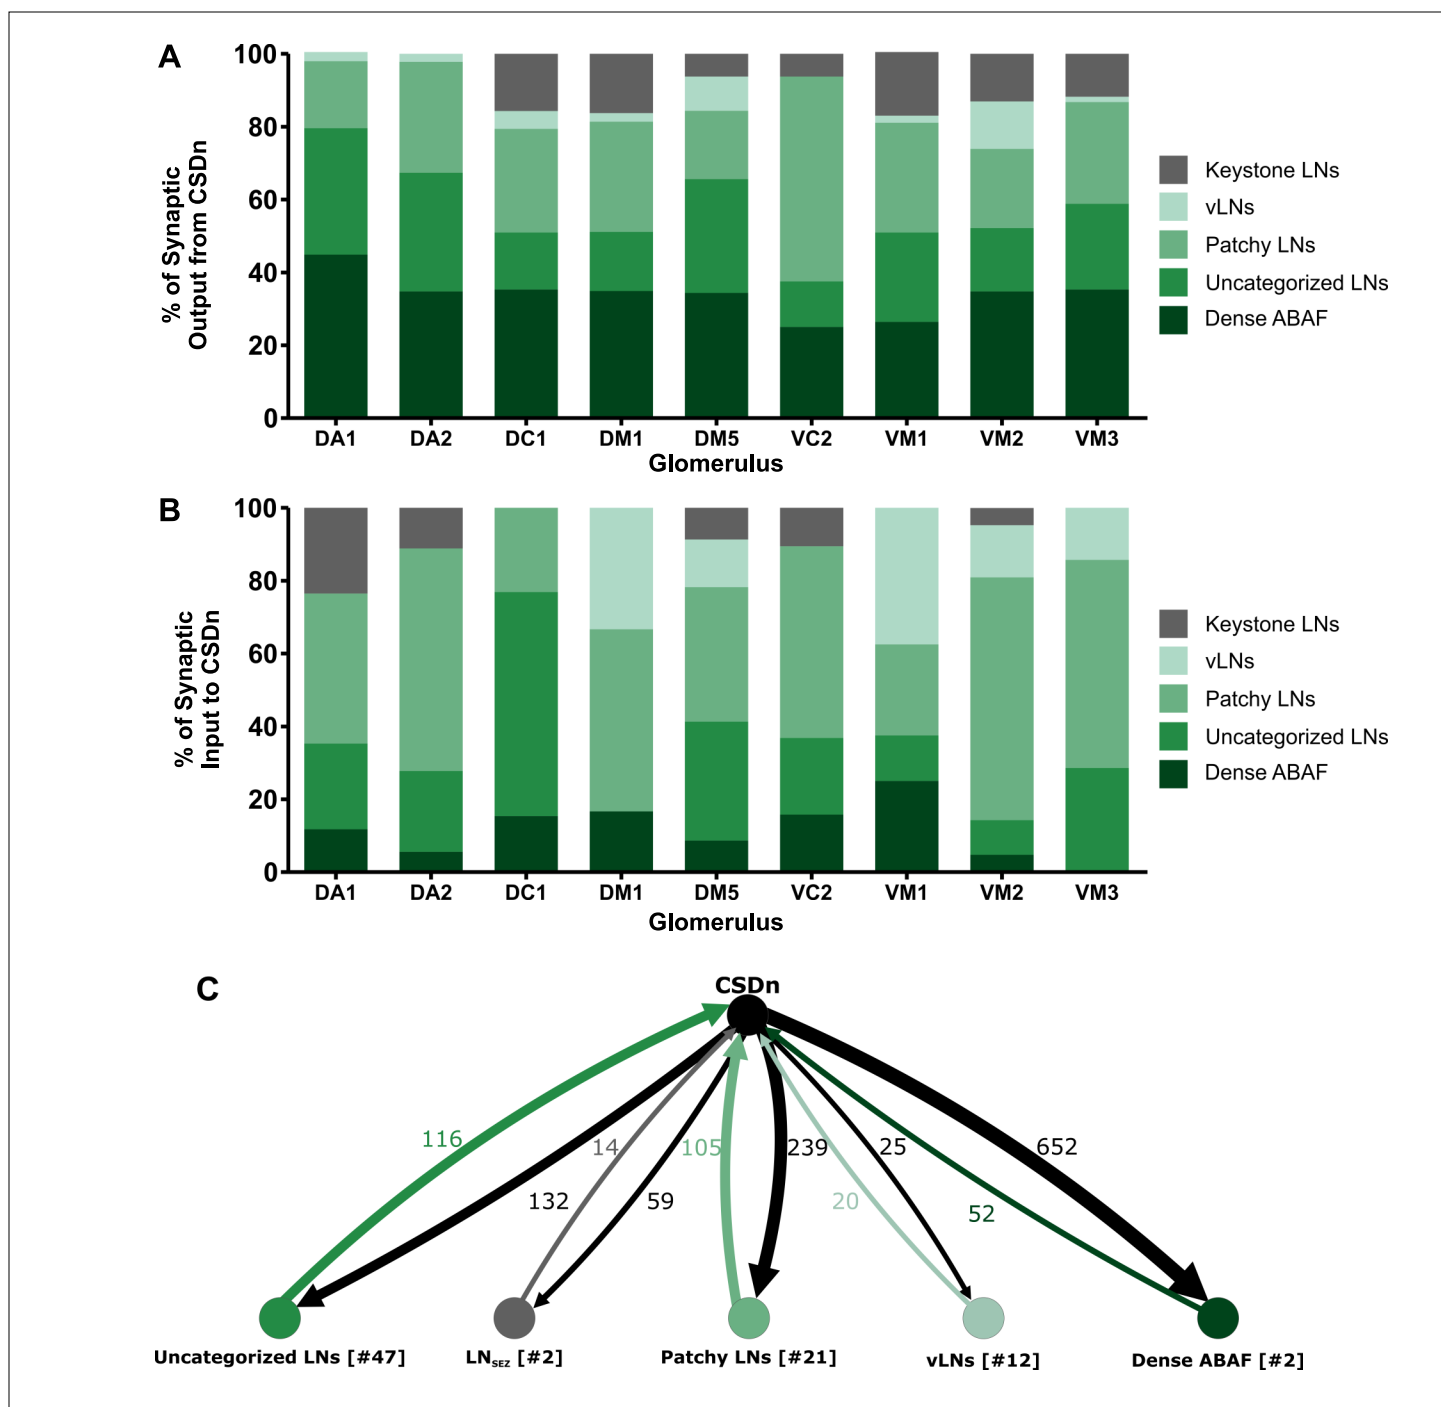

**Figure 3 - figure supplement 1: CSDn input from and to LN subtypes varies across glomeruli.** (A) Percent of synaptic input from the CSDn onto LN subtypes. The CSDn provides input to most LN subtypes across all 9 glomeruli, except for Keystone-like LNs. Dense ABAFs and Patchy LNs appear to be the main LN type which the CSDn targets regardless of glomerulus identity. (B) The CSDn receives far more of its LN synaptic input from Patchy LNs across 9 glomeruli. (C) Number of synapses of the CSDn with each subtype of LN across the AL.



|      | Upstream of CSDn |              |             |
|------|------------------|--------------|-------------|
|      | Dense ABAF 1     | Dense ABAF 2 | Sparse ABAF |
| D    | 0                | 0            | 0           |
| DA1  | 1                | 1            | 0           |
| DA2  | 2                | 0            | 0           |
| DA3  | 0                | 1            | 0           |
| DA4l | 0                | 0            | 0           |
| DA4m | 0                | 0            | 0           |
| DC1  | 0                | 4            | 1           |
| DC2  | 0                | 0            | 0           |
| DC3  | 0                | 0            | 0           |
| DC4  | 0                | 0            | 0           |
| DL1  | 0                | 0            | 0           |
| DL2d | 0                | 0            | 0           |
| DL2v | 1                | 1            | 0           |
| DL3  | 0                | 0            | 0           |
| DL4  | 0                | 0            | 0           |
| DL5  | 0                | 1            | 1           |
| DM1  | 1                | 0            | 0           |
| DM2  | 0                | 1            | 0           |
| DM3  | 0                | 0            | 0           |
| DM4  | 0                | 0            | 0           |
| DM5  | 1                | 1            | 0           |
| DM6  | 0                | 0            | 0           |
| DP1l | 3                | 0            | 0           |
| DP1m | 2                | 1            | 0           |
| V    | 0                | 0            | 0           |
| VA1d | 0                | 0            | 0           |
| VA1v | 0                | 0            | 0           |
| VA2  | 1                | 1            | 0           |
| VA3  | 0                | 1            | 0           |
| VA4  | 0                | 0            | 0           |
| VA5  | 0                | 1            | 0           |
| VA6  | 0                | 1            | 0           |
| VA7l | 0                | 0            | 0           |
| VA7m | 0                | 0            | 0           |
| VC1  | 0                | 2            | 0           |
| VC2  | 0                | 0            | 0           |
| VC3l | 0                | 0            | 0           |
| VC3m | 0                | 0            | 0           |
| VC4  | 1                | 0            | 0           |
| VL1  | 0                | 0            | 0           |
| VL2a | 1                | 0            | 0           |
| VL2p | 2                | 2            | 0           |
| VM1  | 1                | 2            | 0           |
| VM2  | 1                | 0            | 0           |
| VM3  | 1                | 0            | 0           |
| VM4  | 0                | 0            | 0           |
| VM5d | 0                | 0            | 0           |
| VM5v | 0                | 0            | 0           |
| VM7d | 0                | 0            | 0           |
| VM7v | 0                | 0            | 0           |

|      | Downstream of CSDn |              |             |
|------|--------------------|--------------|-------------|
|      | Dense ABAF 1       | Dense ABAF 2 | Sparse ABAF |
| D    | 2                  | 0            | 0           |
| DA1  | 13                 | 9            | 0           |
| DA2  | 13                 | 3            | 0           |
| DA3  | 1                  | 0            | 0           |
| DA4l | 3                  | 4            | 0           |
| DA4m | 2                  | 0            | 0           |
| DC1  | 17                 | 17           | 1           |
| DC2  | 10                 | 9            | 0           |
| DC3  | 1                  | 6            | 0           |
| DC4  | 2                  | 0            | 0           |
| DL1  | 1                  | 7            | 0           |
| DL2d | 6                  | 7            | 0           |
| DL2v | 7                  | 11           | 0           |
| DL3  | 4                  | 2            | 0           |
| DL4  | 0                  | 0            | 0           |
| DL5  | 3                  | 11           | 0           |
| DM1  | 9                  | 7            | 0           |
| DM2  | 7                  | 4            | 0           |
| DM3  | 1                  | 0            | 0           |
| DM4  | 12                 | 9            | 0           |
| DM5  | 7                  | 4            | 0           |
| DM6  | 0                  | 0            | 0           |
| DP1l | 15                 | 5            | 0           |
| DP1m | 31                 | 26           | 0           |
| V    | 4                  | 13           | 0           |
| VA1d | 8                  | 8            | 0           |
| VA1v | 1                  | 4            | 0           |
| VA2  | 23                 | 6            | 0           |
| VA3  | 3                  | 5            | 0           |
| VA4  | 1                  | 4            | 0           |
| VA5  | 0                  | 11           | 0           |
| VA6  | 3                  | 6            | 0           |
| VA7l | 2                  | 2            | 0           |
| VA7m | 5                  | 2            | 0           |
| VC1  | 2                  | 8            | 0           |
| VC2  | 2                  | 2            | 0           |
| VC3l | 7                  | 2            | 0           |
| VC3m | 6                  | 3            | 0           |
| VC4  | 7                  | 3            | 0           |
| VL1  | 1                  | 0            | 0           |
| VL2a | 9                  | 2            | 0           |
| VL2p | 7                  | 4            | 0           |
| VM1  | 2                  | 8            | 0           |
| VM2  | 7                  | 1            | 0           |
| VM3  | 15                 | 11           | 0           |
| VM4  | 2                  | 0            | 0           |
| VM5d | 3                  | 2            | 0           |
| VM5v | 0                  | 0            | 0           |
| VM7d | 7                  | 3            | 0           |
| VM7v | 6                  | 1            | 0           |

**Figure 3 - figure supplement 2: ABAF LN connectivity with the CSDn across glomeruli.** Number of synapses to and from the CSDn with the two dense ABAFs and the sparse ABAF in each glomeruli. Left = from ABAF onto CSDn, Right = CSDn onto ABAF. All ventral-posterior glomeruli and the VC5 glomerulus are excluded. Gray boxes = glomeruli where the LN does not innervate (dictated by having no branchpoints in the glomerulus).

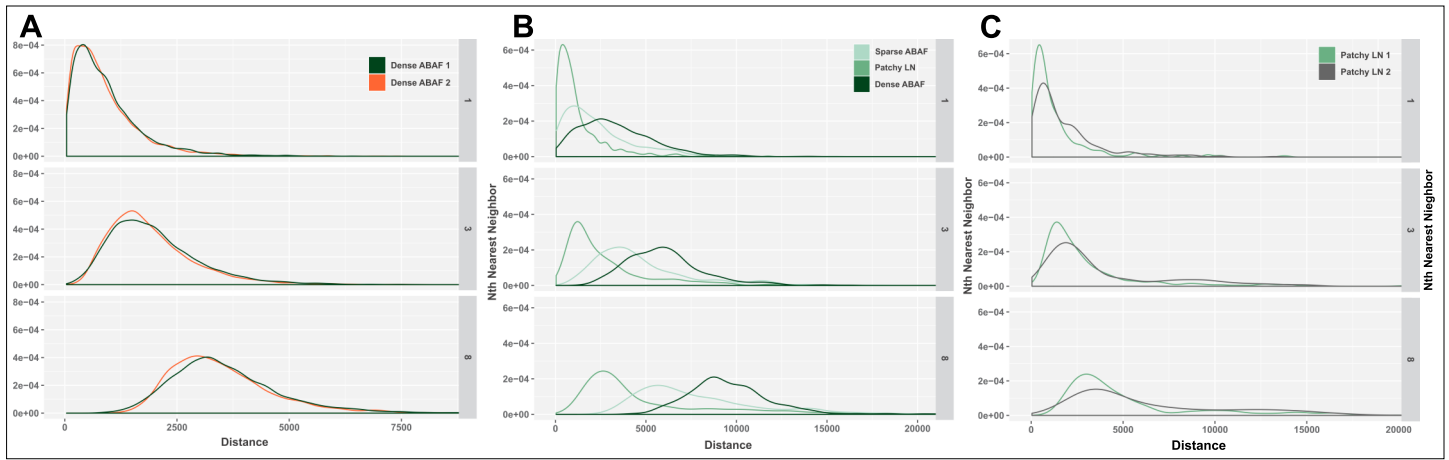

| Glomerulus | Upstream of CSDn in AL |   | Downstream of CSDn in AL |  | Up & Downstream of CSDn in AL |  | Upstream of CSDn in LH |   | Downstream of CSDn in LH |  | Up & Downstream of CSDn in LH |   | Downstream in LH & AL |  | Upstream in LH & AL |  | Downstream in AL, Upstream in LH |  | Upstream & Downstream in AL, Upstream LH |  | Upstream in AL, Downstream in LH |  | Downstream in AL, Up & Downstream in LH |  | Upstream in AL, Up & Downstream in LH |   | Up & Downstream in AL & LH |  |
|------------|------------------------|---|--------------------------|--|-------------------------------|--|------------------------|---|--------------------------|--|-------------------------------|---|-----------------------|--|---------------------|--|----------------------------------|--|------------------------------------------|--|----------------------------------|--|-----------------------------------------|--|---------------------------------------|---|----------------------------|--|
|            | x                      |   | x                        |  | x                             |  | x                      |   | x                        |  | x                             |   | x                     |  | x                   |  | x                                |  | x                                        |  | x                                |  | x                                       |  | x                                     |   | x                          |  |
| DA1        | x                      |   | x                        |  |                               |  |                        |   |                          |  |                               |   |                       |  |                     |  |                                  |  |                                          |  |                                  |  |                                         |  |                                       |   |                            |  |
| DA2        | x                      | x |                          |  |                               |  |                        | x |                          |  |                               | x |                       |  |                     |  |                                  |  |                                          |  |                                  |  |                                         |  |                                       |   |                            |  |
| DA3        |                        | x |                          |  |                               |  |                        |   |                          |  |                               |   |                       |  |                     |  |                                  |  |                                          |  |                                  |  |                                         |  |                                       |   |                            |  |
| DA4m       |                        |   |                          |  |                               |  |                        |   |                          |  |                               | x |                       |  |                     |  |                                  |  |                                          |  |                                  |  |                                         |  |                                       |   |                            |  |
| DA4l       |                        |   |                          |  |                               |  |                        |   |                          |  |                               |   |                       |  |                     |  |                                  |  |                                          |  |                                  |  |                                         |  |                                       | x |                            |  |
| DC2        |                        |   | x                        |  |                               |  |                        |   |                          |  |                               |   |                       |  |                     |  |                                  |  |                                          |  |                                  |  |                                         |  |                                       |   |                            |  |
| DC3        |                        |   |                          |  | x                             |  |                        |   |                          |  |                               |   |                       |  |                     |  |                                  |  |                                          |  |                                  |  |                                         |  |                                       | x |                            |  |
| DC4        |                        |   |                          |  |                               |  |                        |   |                          |  |                               |   |                       |  |                     |  |                                  |  |                                          |  |                                  |  |                                         |  |                                       |   | x                          |  |
| DL1        |                        |   |                          |  |                               |  |                        |   | x                        |  |                               |   |                       |  |                     |  |                                  |  |                                          |  |                                  |  |                                         |  |                                       |   |                            |  |
| DL2D       | x                      |   | x                        |  |                               |  |                        |   |                          |  |                               |   |                       |  |                     |  |                                  |  |                                          |  |                                  |  |                                         |  |                                       |   |                            |  |
| DL2v       | x                      |   | x                        |  |                               |  |                        |   |                          |  |                               |   |                       |  |                     |  |                                  |  |                                          |  |                                  |  |                                         |  |                                       |   |                            |  |
| DL3        |                        |   |                          |  | x                             |  |                        | x |                          |  |                               | x |                       |  |                     |  |                                  |  |                                          |  |                                  |  |                                         |  |                                       |   |                            |  |
| DL4        |                        |   |                          |  |                               |  | x                      |   |                          |  |                               |   |                       |  |                     |  |                                  |  |                                          |  |                                  |  |                                         |  |                                       |   |                            |  |
| DL5        |                        |   |                          |  |                               |  |                        |   |                          |  |                               |   |                       |  |                     |  |                                  |  |                                          |  |                                  |  |                                         |  |                                       | x |                            |  |
| DM1        |                        |   | x                        |  |                               |  |                        |   |                          |  |                               |   |                       |  |                     |  |                                  |  |                                          |  |                                  |  |                                         |  |                                       |   |                            |  |
| DM2        |                        |   | x                        |  |                               |  | x                      |   |                          |  |                               |   |                       |  |                     |  |                                  |  |                                          |  |                                  |  |                                         |  |                                       |   |                            |  |
| DM5        |                        |   |                          |  |                               |  |                        |   |                          |  |                               |   |                       |  |                     |  |                                  |  | x                                        |  |                                  |  |                                         |  | x                                     |   |                            |  |
| DM6        |                        |   |                          |  | x                             |  | x                      |   |                          |  |                               |   |                       |  |                     |  |                                  |  |                                          |  |                                  |  |                                         |  |                                       |   |                            |  |
| DP1m       |                        |   |                          |  |                               |  |                        |   |                          |  |                               |   |                       |  |                     |  |                                  |  |                                          |  |                                  |  |                                         |  |                                       |   |                            |  |
| DP1l       |                        |   |                          |  |                               |  |                        |   |                          |  |                               |   |                       |  |                     |  |                                  |  |                                          |  |                                  |  |                                         |  |                                       |   |                            |  |
| VA1d       | x                      |   |                          |  |                               |  |                        |   |                          |  |                               |   |                       |  |                     |  |                                  |  |                                          |  |                                  |  |                                         |  |                                       |   |                            |  |
| VA1v       | x                      | x |                          |  |                               |  |                        |   |                          |  |                               |   |                       |  |                     |  |                                  |  |                                          |  |                                  |  |                                         |  |                                       |   |                            |  |
| VA3        |                        |   |                          |  |                               |  |                        |   |                          |  |                               |   |                       |  |                     |  |                                  |  |                                          |  |                                  |  |                                         |  |                                       |   |                            |  |
| VA4        |                        |   |                          |  |                               |  |                        |   |                          |  |                               |   |                       |  |                     |  |                                  |  |                                          |  |                                  |  |                                         |  |                                       |   |                            |  |
| VA5        |                        | x | x                        |  |                               |  |                        |   |                          |  |                               |   |                       |  |                     |  |                                  |  |                                          |  |                                  |  |                                         |  |                                       |   |                            |  |
| VA6        |                        |   |                          |  |                               |  |                        |   |                          |  |                               |   |                       |  |                     |  |                                  |  |                                          |  |                                  |  |                                         |  |                                       |   |                            |  |
| VA7l       |                        |   |                          |  |                               |  |                        | x |                          |  |                               |   |                       |  |                     |  |                                  |  |                                          |  |                                  |  |                                         |  |                                       |   |                            |  |
| VA7m       | x                      |   |                          |  |                               |  |                        |   |                          |  |                               |   |                       |  |                     |  |                                  |  |                                          |  |                                  |  |                                         |  |                                       |   |                            |  |
| VC1        |                        |   |                          |  |                               |  | x                      |   |                          |  |                               |   |                       |  |                     |  |                                  |  |                                          |  |                                  |  |                                         |  |                                       |   |                            |  |
| VC2        |                        |   |                          |  |                               |  |                        |   |                          |  |                               |   |                       |  |                     |  |                                  |  |                                          |  |                                  |  |                                         |  |                                       |   |                            |  |
| VC3l       |                        | x |                          |  |                               |  |                        | x |                          |  |                               |   |                       |  |                     |  |                                  |  |                                          |  |                                  |  |                                         |  |                                       |   |                            |  |
| VC3m       | x                      |   |                          |  |                               |  |                        |   |                          |  |                               |   |                       |  |                     |  |                                  |  |                                          |  |                                  |  |                                         |  |                                       |   |                            |  |
| VC4        |                        | x |                          |  |                               |  |                        | x |                          |  |                               |   |                       |  |                     |  |                                  |  |                                          |  |                                  |  |                                         |  |                                       |   |                            |  |
| VC5        |                        |   |                          |  |                               |  |                        |   | x                        |  |                               |   |                       |  |                     |  |                                  |  |                                          |  |                                  |  |                                         |  |                                       |   |                            |  |
| VL2a       |                        |   |                          |  |                               |  |                        | x |                          |  |                               |   |                       |  |                     |  |                                  |  |                                          |  |                                  |  |                                         |  |                                       |   |                            |  |
| VM1        |                        | x |                          |  |                               |  |                        |   |                          |  |                               |   |                       |  |                     |  |                                  |  |                                          |  |                                  |  |                                         |  |                                       |   |                            |  |
| VM2        |                        | x | x                        |  |                               |  |                        |   |                          |  |                               |   |                       |  |                     |  |                                  |  |                                          |  |                                  |  |                                         |  |                                       |   |                            |  |
| VM3        |                        | x |                          |  |                               |  |                        |   |                          |  |                               |   |                       |  |                     |  |                                  |  |                                          |  |                                  |  |                                         |  |                                       |   |                            |  |
| VM4        |                        |   |                          |  |                               |  |                        |   | x                        |  |                               |   |                       |  |                     |  |                                  |  |                                          |  |                                  |  |                                         |  |                                       |   |                            |  |
| VM5d       | x                      |   |                          |  |                               |  |                        |   |                          |  |                               |   |                       |  |                     |  |                                  |  |                                          |  |                                  |  |                                         |  |                                       |   |                            |  |
| VM7D       |                        | x |                          |  |                               |  |                        |   |                          |  |                               |   |                       |  |                     |  |                                  |  |                                          |  |                                  |  |                                         |  |                                       |   |                            |  |
| VM7m       |                        | x |                          |  |                               |  |                        |   |                          |  |                               |   |                       |  |                     |  |                                  |  |                                          |  |                                  |  |                                         |  |                                       |   |                            |  |
| VM7v       |                        | x |                          |  |                               |  |                        |   |                          |  |                               |   |                       |  |                     |  |                                  |  |                                          |  |                                  |  |                                         |  |                                       |   |                            |  |

**Figure 4 - Figure supplement 1: CSDn Connectivity with uPNs in the AL and LH.** Summary table of the types of connectivity individual uPNs have with the CSDn across the AL and LH. Blue = AL only, Red = LH only, Purple = AL & LH, Gray = various combinations of upstream and downstream connectivity. Bolded names represent glomeruli that have uPNs with several different combinations of synaptic connectivity with the CSDn.

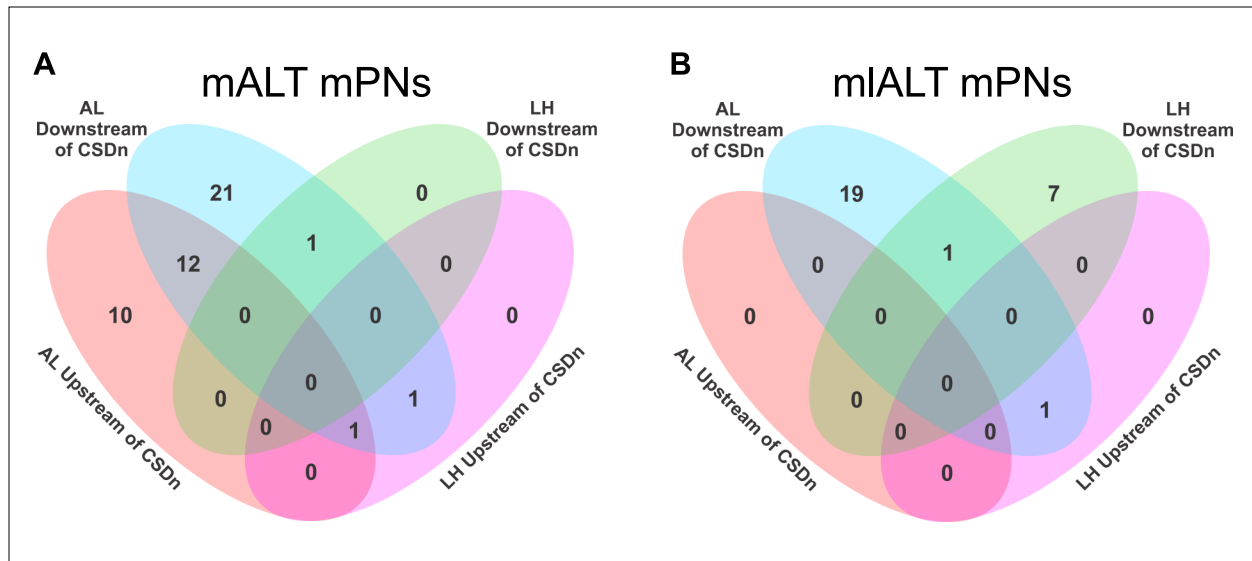

**Figure 4 - figure supplement 2: CSDn Connectivity with mPNs in the AL and LH.** Representation of the number of individual (A) mALT mPNs and (B) mIALT mPNs that receive synaptic input from the CSDn (i.e. downstream), provide synaptic input to the CSDn (i.e. upstream), or both across the AL and LH.

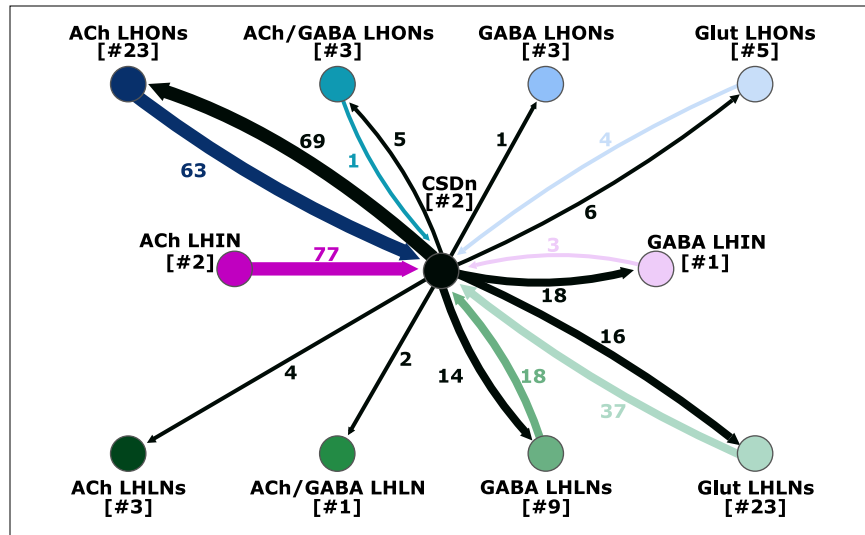

**Figure 5 - figure supplement 1: CSDn's Connectivity with lateral horn neurons based on transmitter content, including weak connectivity.**

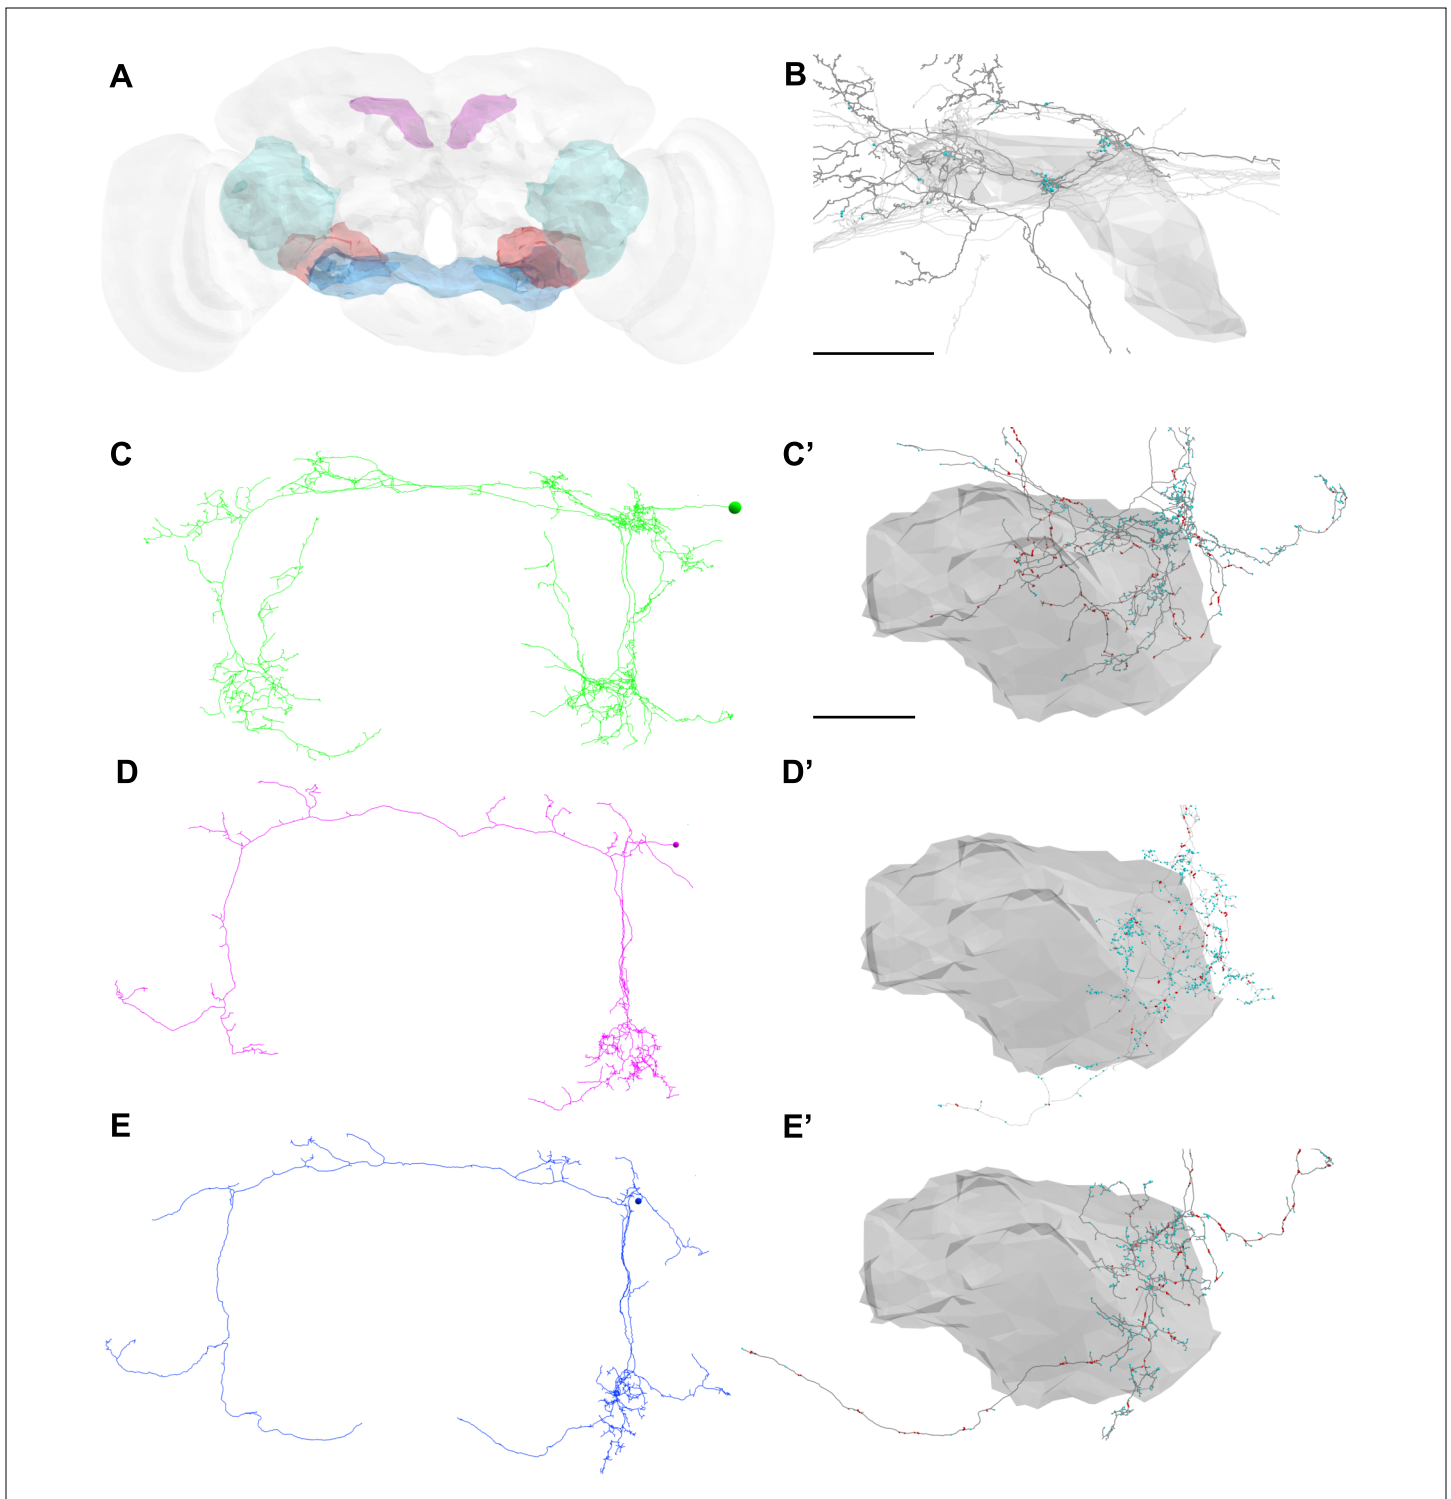

**Figure 6 - figure supplement 1: Three tiers of WPN<sub>s</sub>.** (A) The WPN<sub>s</sub> innervate the highlighted neuropil: ATL (magenta), AVLP (cyan), Saddle (blue), and Wedge (red). (B) WPN<sub>s</sub> (light gray) provide input to the CSDn (dark gray) in the ATL. CSDn postsynaptic sites markers are shown in cyan. EM reconstructions of a Tier 1 WPN<sub>s</sub> (C; green), Tier 2 WPN<sub>s</sub> (D; magenta) and Tier 3 WPN<sub>s</sub> (E; blue). The Tier 1 WPN<sub>s</sub> have two morphologically distinct branches projecting antero-dorsally and larger somata than the Tier 2 and Tier 3 WPN<sub>s</sub>. All three tiers of WPN<sub>s</sub> have dendritic regions in the wedge (blue dots; C', D', E'). Red dots along each skeleton indicate presynaptic sites. Scale Bars = 25  $\mu$ m.

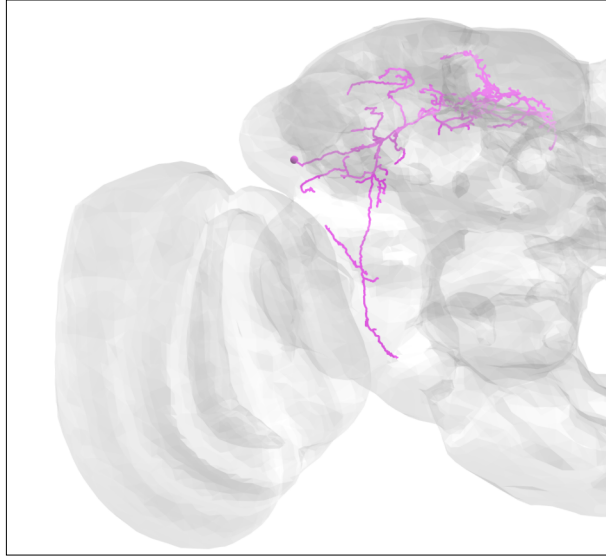

**Figure 6 - figure supplement 2:** EM reconstruction of a previously undescribed protocerebral neuron that provides strong input (at least 90 synapses) to the CSDns in the Superior Medial Protocerebrum, Superior Lateral Protocerebrum, and Antler.

|      | SIMPAL 1 | SIMPAL 2 | SIMPAL 3 | SIMPAL 4 | Total |
|------|----------|----------|----------|----------|-------|
| D    | 0        | 0        | 0        | 0        | -     |
| DA1  | 0        | 0        | 0        | 0        | -     |
| DA2  | 0        | 0        | 0        | 0        | 0     |
| DA3  | 0        | 0        | 0        | 0        | -     |
| DA4l | 0        | 0        | 0        | 0        | -     |
| DA4m | 0        | 0        | 0        | 0        | -     |
| DC1  | 6        | 5        | 9        | 0        | 20    |
| DC2  | 3        | 0        | 3        | 0        | 6     |
| DC3  | 0        | 0        | 0        | 0        | -     |
| DC4  | 0        | 0        | 0        | 0        | -     |
| DL1  | 0        | 1        | 0        | 0        | 1     |
| DL2d | 0        | 0        | 0        | 0        | -     |
| DL2v | 0        | 0        | 0        | 0        | -     |
| DL3  | 0        | 0        | 0        | 0        | -     |
| DL4  | 0        | 0        | 0        | 0        | -     |
| DL5  | 0        | 0        | 0        | 0        | -     |
| DM1  | 2        | 1        | 1        | 0        | 4     |
| DM2  | 0        | 0        | 0        | 0        | 0     |
| DM3  | 0        | 0        | 0        | 0        | -     |
| DM4  | 0        | 1        | 0        | 1        | 2     |
| DM5  | 0        | 0        | 0        | 0        | -     |
| DM6  | 0        | 0        | 0        | 0        | -     |
| DP1l | 3        | 2        | 10       | 1        | 16    |
| DP1m | 6        | 3        | 8        | 12       | 29    |
| V    | 0        | 0        | 0        | 0        | -     |
| VA1d | 0        | 0        | 0        | 0        | -     |
| VA1v | 0        | 0        | 0        | 0        | -     |
| VA2  | 0        | 1        | 5        | 1        | 7     |
| VA3  | 0        | 0        | 0        | 1        | 1     |
| VA4  | 0        | 0        | 0        | 0        | -     |
| VA5  | 0        | 0        | 0        | 0        | -     |
| VA6  | 0        | 0        | 0        | 0        | 0     |
| VA7l | 0        | 0        | 0        | 0        | -     |
| VA7m | 0        | 0        | 0        | 0        | 0     |
| VC1  | 0        | 0        | 0        | 0        | 0     |
| VC2  | 1        | 0        | 0        | 0        | 1     |
| VC3l | 1        | 0        | 0        | 2        | 3     |
| VC3m | 0        | 0        | 0        | 0        | -     |
| VC4  | 1        | 4        | 2        | 1        | 8     |
| VL1  | 0        | 1        | 1        | 2        | 4     |
| VL2a | 0        | 0        | 0        | 0        | -     |
| VL2p | 2        | 2        | 1        | 0        | 5     |
| VM1  | 0        | 0        | 0        | 0        | 0     |
| VM2  | 0        | 0        | 0        | 0        | 0     |
| VM3  | 0        | 0        | 0        | 0        | -     |
| VM4  | 0        | 0        | 0        | 0        | -     |
| VM5d | 0        | 0        | 1        | 0        | 1     |
| VM5v | 0        | 0        | 0        | 0        | -     |
| VM7d | 0        | 0        | 1        | 0        | 1     |
| VM7v | 0        | 0        | 0        | 0        | 0     |

**Figure 7 - figure supplement 1:** Number of synapses from the four SIMPAL neurons onto the CSDn in each glomerulus in the AL. Glomeruli shaded gray are those which the SIMPAL neurons do not innervate.



| <b>FAFB Neuron</b>   | <b>Hemibrain Body ID</b> |
|----------------------|--------------------------|
| CSDn left-Hand       | 759810119                |
| CSDn right-hand      | 851459972                |
| Dense ABAF           | 5813024698               |
| Dense ABAF           | 1640909284               |
| LN <sub>SEZ</sub>    | 1671257931               |
| LN <sub>SEZ</sub>    | 5901206553               |
| Patchy LN            | 1671257931               |
| Patchy LN            | 1704347707               |
| Patchy LN            | 1857799548               |
| SIMPAL               | 1727975215               |
| SIMPAL               | 704699661                |
| SIMPAL               | 5812996052               |
| SIMPAL               | 693927941                |
| WPN <sub>B</sub> 1   | 5813047683               |
| WPN <sub>B</sub> 1   | 787563949                |
| WPN <sub>B</sub> 2/3 | 849279791                |

**Figure 7 - figure supplement 2:** Several key synaptic partners of the CSDn we reconstructed in the FAFB dataset (left) were also identified in the Hemibrain dataset based on morphology (right).
